# Supplementary material for: Induction of Metastatic Gastric Cancer by Peroxisome Proliferator-Activated Receptorδ Activation
Source: PubMed Central journal article supplement (PMC3026990; doi:10.1155/2010/571783), 2010-12-27
Supplement: 571783.f1.pdf [file 571783.f1.pdf]

**TABLE S1. qRT-PCR primers**

| Name          | Accession # | Forward primer         | Reverse primer             |
|---------------|-------------|------------------------|----------------------------|
| Adipsin (Cfd) | NM_013459   | 5'-CAATCATGAACCGGACAA  | 5'-CGCGAGAGCCCCACGTAACCACA |
| Angptl-4      | NM_020581   | 5'-GACTTTTCCAGATCCAGCC | 5'-CTCCGAAGCCATCCTGTAG     |
| BMP2          | NM_007553   | 5'-CGCAGCTTCCATCACGAA  | 5'-TGCAGATGTGAGAAAACTCGTC  |
| BMP4          | NM_007554   | 5'-ATTGCAGCTTCTAGAGG1  | 5'-GGGAGCCAATCTTGAACAAAC   |
| Claudin-2     | NM_016675   | 5'-GCTTGTGACCCCTTGGAC  | 5'-CTCCTTACAAGTATCTGTGGGTG |
| Claudin 8     | NM_018778   | 5'-AGCTGGATACAATTTGGG  | 5'-CCACTGAGGCATGATAGTCAC   |
| Cxcl1         | NM_008176   | 5'-AACCGAAGTCATAGCCAC  | 5'-CAGACGGTGCCATCAGAG      |
| Cxcl5         | NM_009141   | 5'-GTTCCATCTCGCCATTCAT | 5'-TTAAGCAAACAACGCGAGC     |
| Cyp2b10       | NM_009999   | 5'-GCTTTTCTGCCCTTCTCAA | 5'-CTTGGGAGTGAGGTCATGTGTC  |
| Dkk3          | NM_015814   | 5'-GAGATGTTTCGAGAGGTG  | 5'-TTGTGATAGTTGGGAGGTAAGC  |
| Foxg1         | NM_008241   | 5'-CCTGCCCTGTGAGTCTTTA | 5'-CGTTCACCTACAGTCTGGTCC   |
| Gastrin       | NM_010257   | 5'-AACAGCCAATAATCCCC   | 5'-CCAGACTAAGACCAGCATG     |
| PPARalpha     | NM_011144   | 5'-CATTTCCTGTGTTGGCTD  | 5'-ATCTGGATGGTTGCTCTGC     |
| PPARgamma     | NM_011146   | 5'-TGTTATGGGTGAAACTCTC | 5'-AGAGCTGATTCCGAAGTTGG    |
| S100a8        | NM_013650   | 5'-AGTGTCTCAGTTTGTGCA  | 5'-ACTCCTGTGGCTGTCTTTG     |
| Spp1          | NM_009263   | 5'-CCCATCTCAGAAGCAGAA  | 5'-TCATCATCGTCATCATCGTGC   |
| Vegfa         | NM_0010252  | 5'-GGCAGCTTGAGTTAAACG  | 5'-TGGTGACATGGTTAATCGGTC   |
| GAPDH         | NM_008084   | 5'-GCTCATGACCACAGTCCA  | 5'-TTGGCAGCACCAGTGGATG     |
