# Supplementary material for: Induction of Metastatic Gastric Cancer by Peroxisome Proliferator-Activated Receptorδ Activation
Source: Hindawi journal article supplement (doi:10.1155/2010/571783), 2010-01-01
Supplement: f2 [file 571783.f2.pdf]

**TABLE S2. Differentially expressed genes in gastric tumors compared to control stomach.**

| Gene Symbol | Probe set    | Gene Name                                                                     | Stomach | Tumor   | Fold Change |
|-------------|--------------|-------------------------------------------------------------------------------|---------|---------|-------------|
| Aadac       | 1448813_at   | arylacetylamine deacetylase (esterase)                                        | 1200.4  | 251.5   | -4.8        |
| Abca3       | 1451731_at   | ATP-binding cassette, sub-family A (ABC1), member 3                           | 1268.0  | 406.8   | -3.1        |
| Abca8a      | 1427371_at   | ATP-binding cassette, sub-family A (ABC1), member 8a                          | 1136.2  | 100.1   | -11.3       |
| Abcc9       | 1420408_a_at | ATP-binding cassette, sub-family C (CFTR/MRP), member 9                       | 508.2   | 142.8   | -3.6        |
| Abhd14b     | 1451326_at   | abhydrolase domain containing 14b                                             | 1034.7  | 261.6   | -4.0        |
| Abhd3       | 1417946_at   | abhydrolase domain containing 3                                               | 409.7   | 81.9    | -5.0        |
| Abi3bp      | 1427053_at   | ABI gene family, member 3 (NESH) binding protein                              | 992.3   | 102.7   | -9.7        |
| Acad9       | 1429581_at   | acyl-Coenzyme A dehydrogenase family, member 9                                | 1215.7  | 389.7   | -3.1        |
| Acer1       | 1450825_at   | alkaline ceramidase 1                                                         | 1206.1  | 241.4   | -5.0        |
| Acot9       | 1418073_at   | acyl-CoA thioesterase 9                                                       | 917.6   | 2876.9  | 3.1         |
| Acox2       | 1420673_a_at | acyl-Coenzyme A oxidase 2, branched chain                                     | 1285.6  | 153.6   | -8.4        |
| Acsbg1      | 1422428_at   | acyl-CoA synthetase bubblegum family member 1                                 | 977.7   | 3092.2  | 3.2         |
| AcsL4       | 1433531_at   | acyl-CoA synthetase long-chain family member 4                                | 403.9   | 1567.1  | 3.9         |
| Acss1       | 1416617_at   | acyl-CoA synthetase short-chain family member 1                               | 741.5   | 202.6   | -3.7        |
| Acta1       | 1427735_a_at | actin, alpha 1, skeletal muscle                                               | 155.1   | 542.6   | 3.5         |
| Acta2       | 1416454_s_at | actin, alpha 2, smooth muscle, aorta                                          | 25859.0 | 6008.7  | -4.3        |
| Actg2       | 1422340_a_at | actin, gamma 2, smooth muscle, enteric                                        | 14936.8 | 1495.1  | -10.0       |
| Ada         | 1417976_at   | adenosine deaminase                                                           | 20142.4 | 3300.0  | -6.1        |
| Adam12      | 1421172_at   | a disintegrin and metallopeptidase domain 12 (meltrin alpha)                  | 35.5    | 404.4   | 11.4        |
| Adam8       | 1416871_at   | a disintegrin and metallopeptidase domain 8                                   | 224.5   | 1709.1  | 7.6         |
| Adh1        | 1416225_at   | alcohol dehydrogenase 1 (class I)                                             | 4985.2  | 887.9   | -5.6        |
| Adh7        | 1421058_at   | alcohol dehydrogenase 7 (class IV), mu or sigma polypeptide                   | 2734.5  | 538.9   | -5.1        |
| Adipoq      | 1422651_at   | adiponectin, C1Q and collagen domain containing                               | 337.6   | 34.7    | -9.7        |
| Adm         | 1416077_at   | adrenomedullin                                                                | 149.5   | 2091.2  | 14.0        |
| Agr2        | 1419268_at   | anterior gradient 2 (Xenopus laevis)                                          | 5897.7  | 1844.1  | -3.2        |
| Aif1l       | 1424263_at   | allograft inflammatory factor 1-like                                          | 1759.1  | 280.4   | -6.3        |
| Ak3         | 1432436_a_at | adenylate kinase 3                                                            | 746.1   | 180.5   | -4.1        |
| Akap12      | 1419706_a_at | A kinase (PRKA) anchor protein (gravin) 12                                    | 1503.6  | 335.5   | -4.5        |
| Akr1c12     | 1422000_at   | aldo-keto reductase family 1, member C12                                      | 1185.1  | 379.7   | -3.1        |
| Akr1c14     | 1418979_at   | aldo-keto reductase family 1, member C14                                      | 673.1   | 160.1   | -4.2        |
| Akr1c18     | 1419136_at   | aldo-keto reductase family 1, member C18                                      | 44.3    | 420.1   | 9.5         |
| Akr1d1      | 1425771_at   | aldo-keto reductase family 1, member D1                                       | 84.6    | 316.2   | 3.7         |
| Alb         | 1425260_at   | albumin                                                                       | 6338.0  | 239.1   | -26.5       |
| Alcam       | 1426300_at   | activated leukocyte cell adhesion molecule                                    | 326.8   | 2177.7  | 6.7         |
| Aldh1a1     | 1416468_at   | aldehyde dehydrogenase family 1, subfamily A1                                 | 6978.9  | 1227.6  | -5.7        |
| Aldh1a3     | 1448789_at   | aldehyde dehydrogenase family 1, subfamily A3                                 | 64.4    | 2802.6  | 43.5        |
| Aldh1a7     | 1418601_at   | aldehyde dehydrogenase family 1, subfamily A7                                 | 6880.1  | 1290.1  | -5.3        |
| Aldh3a1     | 1418752_at   | aldehyde dehydrogenase family 3, subfamily A1                                 | 7508.8  | 643.7   | -11.7       |
| Aldh6a1     | 1448104_at   | aldehyde dehydrogenase family 6, subfamily A1                                 | 1390.9  | 464.1   | -3.0        |
| Alox15      | 1420338_at   | arachidonate 15-lipoxygenase                                                  | 33.9    | 436.6   | 12.9        |
| Alox5ap     | 1452016_at   | arachidonate 5-lipoxygenase activating protein                                | 396.6   | 1284.4  | 3.2         |
| Angpt2      | 1448831_at   | angiopoietin 2                                                                | 179.5   | 638.9   | 3.6         |
| Angptl4     | 1417130_s_at | angiopoietin-like 4                                                           | 272.6   | 1761.4  | 6.5         |
| Ank1        | 1419421_at   | ankyrin 1, erythroid                                                          | 516.2   | 172.4   | -3.0        |
| Anp32a      | 1450407_a_at | acidic (leucine-rich) nuclear phosphoprotein 32 family, member A              | 576.4   | 96.8    | -6.0        |
| Anxa10      | 1449426_a_at | annexin A10                                                                   | 13369.8 | 3628.6  | -3.7        |
| Anxa3       | 1460330_at   | annexin A3                                                                    | 1972.4  | 8424.0  | 4.3         |
| Anxa6       | 1415818_at   | annexin A6                                                                    | 945.6   | 303.8   | -3.1        |
| Anxa8       | 1417732_at   | annexin A8                                                                    | 1092.4  | 7958.5  | 7.3         |
| Anxa9       | 1431554_a_at | annexin A9                                                                    | 4124.3  | 1130.2  | -3.6        |
| Aoc3        | 1449396_at   | amine oxidase, copper containing 3                                            | 1557.6  | 134.8   | -11.6       |
| Aox4        | 1419215_at   | aldehyde oxidase 4                                                            | 7162.4  | 714.5   | -10.0       |
| Apaf1       | 1452870_at   | apoptotic peptidase activating factor 1                                       | 161.6   | 546.1   | 3.4         |
| Apoa1       | 1419232_a_at | apolipoprotein A-I                                                            | 1640.1  | 380.5   | -4.3        |
| Apoa2       | 1417950_a_at | apolipoprotein A-II                                                           | 630.5   | 83.3    | -7.6        |
| Apoh        | 1416677_at   | apolipoprotein H                                                              | 540.8   | 72.0    | -7.5        |
| Arc         | 1418687_at   | activity regulated cytoskeletal-associated protein                            | 67.1    | 632.9   | 9.4         |
| Areg        | 1421134_at   | amphiregulin                                                                  | 291.0   | 4526.7  | 15.6        |
| Arg1        | 1419549_at   | arginase, liver                                                               | 1474.6  | 22149.4 | 15.0        |
| Arhgap24    | 1424842_a_at | Rho GTPase activating protein 24                                              | 706.4   | 163.5   | -4.3        |
| Arhgap6     | 1451867_x_at | Rho GTPase activating protein 6                                               | 556.8   | 128.0   | -4.3        |
| Armcx3      | 1460359_at   | armadillo repeat containing, X-linked 3                                       | 797.3   | 164.2   | -4.9        |
| Arntl2      | 1425931_a_at | aryl hydrocarbon receptor nuclear translocator-like 2                         | 88.3    | 318.8   | 3.6         |
| Art3        | 1452474_a_at | ADP-ribosyltransferase 3                                                      | 2628.4  | 205.3   | -12.8       |
| Asb13       | 1449459_s_at | ankyrin repeat and SOCS box-containing 13                                     | 521.7   | 174.9   | -3.0        |
| Aspn        | 1416652_at   | asporin                                                                       | 1267.2  | 167.9   | -7.5        |
| Atp1b1      | 1451152_a_at | ATPase, Na <sup>+</sup> /K <sup>+</sup> transporting, beta 1 polypeptide      | 4856.0  | 1430.8  | -3.4        |
| Atp2a3      | 1421129_a_at | ATPase, Ca <sup>++</sup> transporting, ubiquitous                             | 1366.8  | 237.0   | -5.8        |
| Atp4a       | 1421286_a_at | ATPase, H <sup>+</sup> /K <sup>+</sup> exchanging, gastric, alpha polypeptide | 2423.5  | 782.6   | -3.1        |
| Atp4b       | 1448911_at   | ATPase, H <sup>+</sup> /K <sup>+</sup> exchanging, beta polypeptide           | 3882.2  | 1192.5  | -3.3        |

|          |              |                                                                         |        |        |       |
|----------|--------------|-------------------------------------------------------------------------|--------|--------|-------|
| Atp6v0e2 | 1448211_at   | ATPase, H <sup>+</sup> transporting, lysosomal V0 subunit E2            | 938.5  | 216.2  | -4.3  |
| Atp6v1c2 | 1430306_a_at | ATPase, H <sup>+</sup> transporting, lysosomal V1 subunit C2            | 1957.2 | 513.2  | -3.8  |
| Aurka    | 1424511_at   | aurora kinase A                                                         | 173.8  | 604.7  | 3.5   |
| Avil     | 1419148_at   | advillin                                                                | 1430.4 | 403.1  | -3.5  |
| B3galnt1 | 1418736_at   | UDP-GalNAc:betaGlcNAc beta 1,3-galactosaminyltransferase, polypeptide 1 | 688.6  | 152.3  | -4.5  |
| Barx1    | 1423342_at   | BarH-like homeobox 1                                                    | 833.0  | 134.6  | -6.2  |
| Bche     | 1437863_at   | butyrylcholinesterase                                                   | 368.0  | 27.4   | -13.4 |
| Bckdhh   | 1427153_at   | branched chain ketoacid dehydrogenase E1, beta polypeptide              | 2010.2 | 624.1  | -3.2  |
| Bdh1     | 1452257_at   | 3-hydroxybutyrate dehydrogenase, type 1                                 | 3372.0 | 770.3  | -4.4  |
| Bex1     | 1448595_a_at | brain expressed gene 1                                                  | 321.0  | 92.1   | -3.5  |
| Bhlhe22  | 1418271_at   | basic helix-loop-helix family, member e22                               | 37.1   | 435.1  | 11.7  |
| Bhlhe40  | 1418025_at   | basic helix-loop-helix family, member e40                               | 969.1  | 3059.2 | 3.2   |
| Birc5    | 1424278_a_at | baculoviral IAP repeat-containing 5                                     | 222.9  | 1227.4 | 5.5   |
| Bmp2     | 1423635_at   | bone morphogenetic protein 2                                            | 1451.4 | 462.6  | -3.1  |
| Bmp4     | 1422912_at   | bone morphogenetic protein 4                                            | 821.6  | 128.3  | -6.4  |
| Bnc1     | 1424890_at   | basonuclin 1                                                            | 225.3  | 1439.1 | 6.4   |
| Bst1     | 1449453_at   | bone marrow stromal cell antigen 1                                      | 87.0   | 446.1  | 5.1   |
| Bub1     | 1424046_at   | budding uninhibited by benzimidazoles 1 homolog (S. cerevisiae)         | 113.9  | 914.1  | 8.0   |
| Bub1b    | 1416961_at   | budding uninhibited by benzimidazoles 1 homolog, beta (S. cerevisiae)   | 140.0  | 538.3  | 3.8   |
| Cachd1   | 1436030_at   | cache domain containing 1                                               | 844.7  | 207.9  | -4.1  |
| Cadm4    | 1426263_at   | cell adhesion molecule 4                                                | 336.8  | 1637.1 | 4.9   |
| Calcb    | 1422639_at   | calcitonin-related polypeptide, beta                                    | 72.0   | 6898.0 | 95.8  |
| Calml4   | 1424713_at   | calmodulin-like 4                                                       | 712.3  | 178.7  | -4.0  |
| Camkk1   | 1418954_at   | calcium/calmodulin-dependent protein kinase kinase 1, alpha             | 641.0  | 126.4  | -5.1  |
| Cap2     | 1450910_at   | CAP, adenylate cyclase-associated protein, 2 (yeast)                    | 325.3  | 41.4   | -7.9  |
| Capg     | 1450355_a_at | capping protein (actin filament), gelsolin-like                         | 1053.6 | 4868.4 | 4.6   |
| Capn1    | 1417229_at   | calpain 1                                                               | 335.8  | 75.1   | -4.5  |
| Car3     | 1449434_at   | carbonic anhydrase 3                                                    | 1289.8 | 204.0  | -6.3  |
| Cartpt   | 1422825_at   | CART prepropeptide                                                      | 532.9  | 97.1   | -5.5  |
| Casp14   | 1418748_at   | caspase 14                                                              | 4846.4 | 392.7  | -12.3 |
| Cbx6     | 1424407_s_at | chromobox homolog 6                                                     | 1162.0 | 389.4  | -3.0  |
| Ccbl2    | 1455991_at   | cysteine conjugate-beta lyase 2                                         | 638.9  | 161.0  | -4.0  |
| Ccdc99   | 1424971_at   | coiled-coil domain containing 99                                        | 115.2  | 366.5  | 3.2   |
| Ccl2     | 1420380_at   | chemokine (C-C motif) ligand 2                                          | 84.1   | 1077.6 | 12.8  |
| Ccl3     | 1419561_at   | chemokine (C-C motif) ligand 3                                          | 17.0   | 487.6  | 28.7  |
| Ccl8     | 1419684_at   | chemokine (C-C motif) ligand 8                                          | 101.9  | 1368.6 | 13.4  |
| Ccl9     | 1417936_at   | chemokine (C-C motif) ligand 9                                          | 363.1  | 1441.5 | 4.0   |
| Ccnb1    | 1419943_s_at | cyclin B1                                                               | 220.8  | 758.6  | 3.4   |
| Ccnd1    | 1417420_at   | cyclin D1                                                               | 1323.7 | 4946.3 | 3.7   |
| Ccr1     | 1419609_at   | chemokine (C-C motif) receptor 1                                        | 51.4   | 592.2  | 11.5  |
| Ccr12    | 1427736_a_at | chemokine (C-C motif) receptor-like 2                                   | 88.7   | 310.4  | 3.5   |
| Cd14     | 1417268_at   | CD14 antigen                                                            | 408.0  | 3730.6 | 9.1   |
| Cd300a   | 1435903_at   | CD300A antigen                                                          | 43.8   | 332.4  | 7.6   |
| Cd38     | 1433741_at   | CD38 antigen                                                            | 169.0  | 599.9  | 3.5   |
| Cd52     | 1460218_at   | CD52 antigen                                                            | 370.2  | 1281.3 | 3.5   |
| Cd53     | 1448617_at   | CD53 antigen                                                            | 350.5  | 1802.0 | 5.1   |
| Cd55     | 1460242_at   | CD55 antigen                                                            | 750.7  | 156.5  | -4.8  |
| Cd68     | 1449164_at   | CD68 antigen                                                            | 258.7  | 797.5  | 3.1   |
| Cd84     | 1422875_at   | CD84 antigen                                                            | 69.2   | 427.5  | 6.2   |
| Cdc20    | 1439377_x_at | cell division cycle 20 homolog (S. cerevisiae)                          | 1270.6 | 4701.0 | 3.7   |
| Cdc2a    | 1448314_at   | cell division cycle 2 homolog A (S. pombe)                              | 421.6  | 1925.9 | 4.6   |
| Cdca3    | 1452040_a_at | cell division cycle associated 3                                        | 192.4  | 602.8  | 3.1   |
| Cdh5     | 1433956_at   | cadherin 5                                                              | 81.6   | 338.0  | 4.1   |
| Cdkn1c   | 1417649_at   | cyclin-dependent kinase inhibitor 1C (P57)                              | 385.7  | 124.9  | -3.1  |
| Cdkn2a   | 1450140_a_at | cyclin-dependent kinase inhibitor 2A                                    | 20.3   | 312.4  | 15.4  |
| Cdkn2b   | 1449152_at   | cyclin-dependent kinase inhibitor 2B (p15, inhibits CDK4)               | 221.8  | 1447.1 | 6.5   |
| Cdsn     | 1435191_at   | corneodesmosin                                                          | 5323.8 | 959.8  | -5.5  |
| Ceacam1  | 1425538_x_at | carcinoembryonic antigen-related cell adhesion molecule 1               | 235.8  | 3813.6 | 16.2  |
| Cela1    | 1423693_at   | chymotrypsin-like elastase family, member 1                             | 4573.7 | 447.0  | -10.2 |
| Cenpa    | 1450842_a_at | centromere protein A                                                    | 201.7  | 991.6  | 4.9   |
| Cep55    | 1452242_at   | centrosomal protein 55                                                  | 139.0  | 766.0  | 5.5   |
| Ces3     | 1435370_a_at | carboxylesterase 3                                                      | 2775.9 | 129.1  | -21.5 |
| Cfd      | 1417867_at   | complement factor D (adipsin)                                           | 310.2  | 90.7   | -3.4  |
| Cfl2     | 1418066_at   | cofilin 2, muscle                                                       | 1337.7 | 376.3  | -3.6  |
| Chchd10  | 1436990_s_at | coiled-coil-helix-coiled-coil-helix domain containing 10                | 7132.4 | 2192.5 | -3.3  |
| Chchd5   | 1451505_at   | coiled-coil-helix-coiled-coil-helix domain containing 5                 | 218.9  | 723.5  | 3.3   |
| Chgb     | 1415885_at   | chromogranin B                                                          | 1117.8 | 80.5   | -13.9 |
| Chi31    | 1451537_at   | chitinase 3-like 1                                                      | 70.6   | 712.2  | 10.1  |
| Chi313   | 1419764_at   | chitinase 3-like 3                                                      | 22.4   | 986.3  | 44.1  |
| Chi314   | 1425450_at   | chitinase 3-like 4                                                      | 476.3  | 7236.1 | 15.2  |
| Chodl    | 1451440_at   | chondrolectin                                                           | 852.8  | 178.2  | -4.8  |
| Chpt1    | 1455901_at   | choline phosphotransferase 1                                            | 587.5  | 141.1  | -4.2  |

|         |              |                                                                                   |         |        |       |
|---------|--------------|-----------------------------------------------------------------------------------|---------|--------|-------|
| Chrdl1  | 1421295_at   | chordin-like 1                                                                    | 374.7   | 50.0   | -7.5  |
| Cideb   | 1418976_s_at | cell death-inducing DNA fragmentation factor, alpha subunit-like effector B       | 331.2   | 92.6   | -3.6  |
| Cited4  | 1425400_a_at | Cbp/p300-interacting transactivator, with Glu/Asp-rich carboxy-terminal domain, 4 | 1173.2  | 116.9  | -10.0 |
| Ckap2   | 1434748_at   | cytoskeleton associated protein 2                                                 | 242.1   | 756.6  | 3.1   |
| Ckb     | 1455106_a_at | creatine kinase, brain                                                            | 4668.1  | 594.5  | -7.9  |
| Cks1b   | 1416698_a_at | CDC28 protein kinase 1b                                                           | 1867.6  | 5857.1 | 3.1   |
| Cks2    | 1417457_at   | CDC28 protein kinase regulatory subunit 2                                         | 687.7   | 2105.3 | 3.1   |
| Clca3   | 1416306_at   | chloride channel calcium activated 3                                              | 2163.8  | 77.3   | -28.0 |
| Cldn18  | 1449428_at   | claudin 18                                                                        | 3103.4  | 433.9  | -7.2  |
| Cldn2   | 1417231_at   | claudin 2                                                                         | 572.0   | 127.4  | -4.5  |
| Cldn23  | 1424409_at   | claudin 23                                                                        | 2499.9  | 607.7  | -4.1  |
| Cldn3   | 1426332_a_at | claudin 3                                                                         | 38.9    | 300.4  | 7.7   |
| Cldn7   | 1448393_at   | claudin 7                                                                         | 177.9   | 1393.1 | 7.8   |
| Cldn8   | 1449091_at   | claudin 8                                                                         | 22.3    | 2811.3 | 126.1 |
| Clec3b  | 1449466_at   | C-type lectin domain family 3, member b                                           | 1362.5  | 186.2  | -7.3  |
| Clec4d  | 1420804_s_at | C-type lectin domain family 4, member d                                           | 24.9    | 486.3  | 19.5  |
| Clec4e  | 1420330_at   | C-type lectin domain family 4, member e                                           | 12.6    | 511.2  | 40.5  |
| Clec4n  | 1425951_a_at | C-type lectin domain family 4, member n                                           | 30.9    | 841.9  | 27.2  |
| Clec7a  | 1420699_at   | C-type lectin domain family 7, member a                                           | 76.0    | 890.8  | 11.7  |
| Cnn1    | 1417917_at   | calponin 1                                                                        | 11427.9 | 627.2  | -18.2 |
| Col14a1 | 1427168_a_at | collagen, type XIV, alpha 1                                                       | 2225.6  | 267.5  | -8.3  |
| Col17a1 | 1418799_a_at | collagen, type XVII, alpha 1                                                      | 1170.0  | 4868.9 | 4.2   |
| Col18a1 | 1418237_s_at | collagen, type XVIII, alpha 1                                                     | 417.7   | 2177.7 | 5.2   |
| Col4a5  | 1425476_at   | collagen, type IV, alpha 5                                                        | 3744.3  | 308.1  | -12.2 |
| Col4a6  | 1421007_at   | collagen, type IV, alpha 6                                                        | 623.7   | 64.7   | -9.6  |
| Col6a1  | 1448590_at   | collagen, type VI, alpha 1                                                        | 3390.0  | 774.4  | -4.4  |
| Col6a2  | 1452250_a_at | collagen, type VI, alpha 2                                                        | 3746.8  | 1015.4 | -3.7  |
| Cpn1    | 1417745_at   | carboxypeptidase N, polypeptide 1                                                 | 313.3   | 105.2  | -3.0  |
| Cpox    | 1422492_at   | coproporphyrinogen oxidase                                                        | 562.1   | 181.0  | -3.1  |
| Crip2   | 1417311_at   | cysteine rich protein 2                                                           | 5030.3  | 1367.3 | -3.7  |
| Crisp1  | 1416325_at   | cysteine-rich secretory protein 1                                                 | 17.7    | 715.1  | 40.4  |
| Cryab   | 1416455_a_at | crystallin, alpha B                                                               | 1433.3  | 363.0  | -3.9  |
| Cry11   | 1416795_at   | crystallin, lambda 1                                                              | 488.3   | 155.6  | -3.1  |
| Csf2rb  | 1421326_at   | colony stimulating factor 2 receptor, beta, low-affinity (granulocyte-macrophage) | 56.1    | 367.2  | 6.6   |
| Csf3    | 1419427_at   | colony stimulating factor 3 (granulocyte)                                         | 24.3    | 361.9  | 14.9  |
| Cspg4   | 1423341_at   | chondroitin sulfate proteoglycan 4                                                | 397.3   | 115.1  | -3.5  |
| Csrp1   | 1425811_a_at | cysteine and glycine-rich protein 1                                               | 6649.5  | 718.2  | -9.3  |
| Ctla2a  | 1448471_a_at | cytotoxic T lymphocyte-associated protein 2 alpha                                 | 667.6   | 3326.6 | 5.0   |
| Ctsc    | 1416382_at   | cathepsin C                                                                       | 2367.9  | 8863.0 | 3.7   |
| Ctse    | 1418989_at   | cathepsin E                                                                       | 15476.1 | 2629.4 | -5.9  |
| Ctsh    | 1418365_at   | cathepsin H                                                                       | 634.1   | 2584.8 | 4.1   |
| Ctss    | 1448591_at   | cathepsin S                                                                       | 1295.6  | 6903.4 | 5.3   |
| Cx3cl1  | 1415803_at   | chemokine (C-X3-C motif) ligand 1                                                 | 128.2   | 378.3  | 3.0   |
| Cxcl1   | 1419209_at   | chemokine (C-X-C motif) ligand 1                                                  | 20.0    | 2004.9 | 100.0 |
| Cxcl13  | 1417851_at   | chemokine (C-X-C motif) ligand 13                                                 | 239.0   | 979.1  | 4.1   |
| Cxcl14  | 1418457_at   | chemokine (C-X-C motif) ligand 14                                                 | 58.6    | 324.8  | 5.5   |
| Cxcl16  | 1449195_s_at | chemokine (C-X-C motif) ligand 16                                                 | 115.0   | 664.3  | 5.8   |
| Cxcl2   | 1449984_at   | chemokine (C-X-C motif) ligand 2                                                  | 16.0    | 1745.1 | 109.2 |
| Cxcl5   | 1419728_at   | chemokine (C-X-C motif) ligand 5                                                  | 12.2    | 1774.0 | 145.6 |
| Cxcl9   | 1418652_at   | chemokine (C-X-C motif) ligand 9                                                  | 39.6    | 525.5  | 13.3  |
| Cyp2b10 | 1425645_s_at | cytochrome P450, family 2, subfamily b, polypeptide 10                            | 100.6   | 576.4  | 5.7   |
| Cyp2c65 | 1429994_s_at | cytochrome P450, family 2, subfamily c, polypeptide 65                            | 1523.7  | 345.6  | -4.4  |
| Cyp2e1  | 1415994_at   | cytochrome P450, family 2, subfamily e, polypeptide 1                             | 646.8   | 41.8   | -15.5 |
| Cyp2s1  | 1428283_at   | cytochrome P450, family 2, subfamily s, polypeptide 1                             | 10378.4 | 2815.4 | -3.7  |
| Cyp3a11 | 1416809_at   | cytochrome P450, family 3, subfamily a, polypeptide 11                            | 497.9   | 19.3   | -25.9 |
| Cyp7b1  | 1421074_at   | cytochrome P450, family 7, subfamily b, polypeptide 1                             | 93.2    | 407.1  | 4.4   |
| Cyr61   | 1416039_x_at | cysteine rich protein 61                                                          | 332.3   | 1102.9 | 3.3   |
| Cytip   | 1435697_a_at | cytohesin 1 interacting protein                                                   | 250.5   | 813.2  | 3.2   |
| Dab1    | 1427308_at   | disabled homolog 1 (Drosophila)                                                   | 364.0   | 33.1   | -11.0 |
| Dbf4    | 1418334_at   | DBF4 homolog (S. cerevisiae)                                                      | 387.5   | 1144.8 | 3.0   |
| Dbp     | 1438211_s_at | D site albumin promoter binding protein                                           | 5067.3  | 728.8  | -7.0  |
| Dbt     | 1449118_at   | dihydrolipoamide branched chain transacylase E2                                   | 621.9   | 205.4  | -3.0  |
| Ddr2    | 1422738_at   | discoidin domain receptor family, member 2                                        | 531.4   | 99.5   | -5.3  |
| Ddx59   | 1460333_at   | DEAD (Asp-Glu-Ala-Asp) box polypeptide 59                                         | 332.8   | 1042.7 | 3.1   |
| Defb3   | 1421806_at   | defensin beta 3                                                                   | 104.2   | 724.9  | 7.0   |
| Defb4   | 1419600_at   | defensin beta 4                                                                   | 44.1    | 636.5  | 14.4  |
| Depdc7  | 1424303_at   | DEP domain containing 7                                                           | 132.3   | 610.7  | 4.6   |
| Des     | 1426731_at   | desmin                                                                            | 5379.5  | 562.3  | -9.6  |
| Dexi    | 1460174_at   | dexamethasone-induced transcript                                                  | 942.8   | 317.1  | -3.0  |
| Dkk1    | 1417787_at   | dickkopf-like 1                                                                   | 1454.3  | 303.9  | -4.8  |
| Dlg2    | 1421199_at   | discs, large homolog 2 (Drosophila)                                               | 706.5   | 145.2  | -4.9  |
| Dlx3    | 1450475_at   | distal-less homeobox 3                                                            | 617.6   | 182.6  | -3.4  |

|          |              |                                                                     |         |         |       |
|----------|--------------|---------------------------------------------------------------------|---------|---------|-------|
| Dmd      | 1448665_at   | dystrophin, muscular dystrophy                                      | 463.9   | 62.6    | -7.4  |
| Dmpk     | 1434944_at   | dystrophia myotonica-protein kinase                                 | 1285.5  | 89.0    | -14.4 |
| Dnajb5   | 1450436_s_at | DnaJ (Hsp40) homolog, subfamily B, member 5                         | 610.4   | 63.8    | -9.6  |
| Dnajb6   | 1429776_a_at | DnaJ (Hsp40) homolog, subfamily B, member 6                         | 292.9   | 868.6   | 3.0   |
| Dnase112 | 1450936_a_at | deoxyribonuclease 1-like 2                                          | 3133.7  | 501.1   | -6.3  |
| Dnm2     | 1432004_a_at | dynamain 2                                                          | 421.0   | 126.9   | -3.3  |
| Dpt      | 1418511_at   | dermatopontin                                                       | 3975.0  | 499.9   | -8.0  |
| Dram1    | 1424524_at   | DNA-damage regulated autophagy modulator 1                          | 210.4   | 898.8   | 4.3   |
| Dsc1     | 1421460_at   | desmocollin 1                                                       | 2922.8  | 789.8   | -3.7  |
| Dsc2     | 1426911_at   | desmocollin 2                                                       | 1926.7  | 7934.7  | 4.1   |
| Dst      | 1423626_at   | dystonin                                                            | 987.5   | 289.9   | -3.4  |
| Dtna     | 1429768_at   | dystrobrevin alpha                                                  | 476.9   | 37.2    | -12.8 |
| Dusp6    | 1415834_at   | dual specificity phosphatase 6                                      | 304.4   | 4674.6  | 15.4  |
| Dusp7    | 1460393_a_at | dual specificity phosphatase 7                                      | 88.7    | 355.9   | 4.0   |
| Ect2     | 1419513_a_at | ect2 oncogene                                                       | 122.2   | 433.8   | 3.5   |
| Egfl6    | 1419332_at   | EGF-like-domain, multiple 6                                         | 2291.3  | 415.9   | -5.5  |
| Elk3     | 1448797_at   | ELK3, member of ETS oncogene family                                 | 330.2   | 1461.8  | 4.4   |
| Elov16   | 1417404_at   | ELOVL family member 6, elongation of long chain fatty acids (yeast) | 7991.9  | 1455.7  | -5.5  |
| Emb      | 1415857_at   | embigin                                                             | 478.3   | 3256.7  | 6.8   |
| Emilin1  | 1416414_at   | elastin microfibril interfacier 1                                   | 858.2   | 215.1   | -4.0  |
| Eno3     | 1417951_at   | enolase 3, beta muscle                                              | 1038.7  | 319.8   | -3.2  |
| Enpep    | 1448649_at   | glutamyl aminopeptidase                                             | 920.4   | 119.9   | -7.7  |
| Enpp1    | 1459546_s_at | ectonucleotide pyrophosphatase/phosphodiesterase 1                  | 173.6   | 626.2   | 3.6   |
| Enpp2    | 1448136_at   | ectonucleotide pyrophosphatase/phosphodiesterase 2                  | 1758.0  | 286.0   | -6.1  |
| Epcam    | 1416579_a_at | epithelial cell adhesion molecule                                   | 2095.9  | 7965.9  | 3.8   |
| Epdrl    | 1450380_at   | ependymin related protein 1 (zebrafish)                             | 722.3   | 145.3   | -5.0  |
| Epgn     | 1449994_at   | epithelial mitogen                                                  | 88.6    | 1871.1  | 21.1  |
| Epha2    | 1421151_a_at | Eph receptor A2                                                     | 190.5   | 1219.9  | 6.4   |
| Eppk1    | 1427537_at   | epiplakin 1                                                         | 3884.1  | 966.8   | -4.0  |
| Eps811   | 1431821_a_at | EPS8-like 1                                                         | 3124.0  | 803.9   | -3.9  |
| Ero11    | 1419029_at   | ERO1-like (S. cerevisiae)                                           | 1105.5  | 4076.2  | 3.7   |
| Ethe1    | 1417203_at   | ethylmalonic encephalopathy 1                                       | 2978.5  | 944.0   | -3.2  |
| Ets1     | 1452163_at   | E26 avian leukemia oncogene 1, 5' domain                            | 206.6   | 619.9   | 3.0   |
| Evi2a    | 1450241_a_at | ecotropic viral integration site 2a                                 | 117.6   | 393.5   | 3.3   |
| Expi     | 1417160_s_at | extracellular proteinase inhibitor                                  | 72.7    | 346.3   | 4.8   |
| Eya2     | 1424127_at   | eyes absent 2 homolog (Drosophila)                                  | 93.8    | 433.6   | 4.6   |
| Fabp1    | 1448764_a_at | fatty acid binding protein 1, liver                                 | 846.0   | 138.0   | -6.1  |
| Fabp2    | 1418438_at   | fatty acid binding protein 2, intestinal                            | 1999.0  | 331.7   | -6.0  |
| Fam129a  | 1422567_at   | family with sequence similarity 129, member A                       | 1842.9  | 421.3   | -4.4  |
| Fam13c   | 1448557_at   | family with sequence similarity 13, member C                        | 322.7   | 61.7    | -5.2  |
| Fam162a  | 1451385_at   | family with sequence similarity 162, member A                       | 3845.6  | 16413.3 | 4.3   |
| Fam26e   | 1424680_at   | family with sequence similarity 26, member E                        | 407.2   | 57.7    | -7.1  |
| Fam60a   | 1448126_at   | family with sequence similarity 60, member A                        | 138.4   | 683.4   | 4.9   |
| Fbln2    | 1423407_a_at | fibulin 2                                                           | 357.6   | 1097.4  | 3.1   |
| Fbp2     | 1449088_at   | fructose biphosphatase 2                                            | 1042.8  | 3291.3  | 3.2   |
| Fbxo32   | 1448747_at   | F-box protein 32                                                    | 2382.6  | 698.9   | -3.4  |
| Fcgr1g   | 1418340_at   | Fc receptor, IgE, high affinity I, gamma polypeptide                | 183.0   | 867.0   | 4.7   |
| Fcgbp    | 1426872_at   | Fc fragment of IgG binding protein                                  | 652.8   | 210.7   | -3.1  |
| Fcgr1    | 1417876_at   | Fc receptor, IgG, high affinity I                                   | 47.1    | 327.0   | 6.9   |
| Fcgr2b   | 1435477_s_at | Fc receptor, IgG, low affinity IIb                                  | 310.7   | 1580.8  | 5.1   |
| Fcgr3    | 1448620_at   | Fc receptor, IgG, low affinity III                                  | 455.9   | 2571.8  | 5.6   |
| Fermt2   | 1434180_at   | fermitin family homolog 2 (Drosophila)                              | 4140.4  | 769.6   | -5.4  |
| Fermt3   | 1433963_a_at | fermitin family homolog 3 (Drosophila)                              | 817.8   | 240.3   | -3.4  |
| Fes      | 1452410_a_at | feline sarcoma oncogene                                             | 113.7   | 453.3   | 4.0   |
| Fetub    | 1449555_a_at | fetuin beta                                                         | 5683.2  | 843.0   | -6.7  |
| Fgf22    | 1460296_a_at | fibroblast growth factor 22                                         | 366.4   | 105.6   | -3.5  |
| Fgfr2    | 1433489_s_at | fibroblast growth factor receptor 2                                 | 2350.3  | 532.5   | -4.4  |
| Fgl2     | 1421855_at   | fibrinogen-like protein 2                                           | 1921.8  | 318.7   | -6.0  |
| Fhl1     | 1417872_at   | four and a half LIM domains 1                                       | 12740.9 | 1706.1  | -7.5  |
| Fibin    | 1419376_at   | fin bud initiation factor homolog (zebrafish)                       | 670.9   | 189.9   | -3.5  |
| Figl1    | 1422430_at   | fidgetin-like 1                                                     | 125.3   | 387.0   | 3.1   |
| Flg      | 1427268_at   | filaggrin                                                           | 8181.3  | 1334.0  | -6.1  |
| Flna     | 1426677_at   | filamin, alpha                                                      | 9958.7  | 2663.7  | -3.7  |
| Flnc     | 1449073_at   | filamin C, gamma                                                    | 430.6   | 139.2   | -3.1  |
| Fmo1     | 1417429_at   | flavin containing monooxygenase 1                                   | 376.3   | 66.3    | -5.7  |
| Fmo2     | 1422905_s_at | flavin containing monooxygenase 2                                   | 870.4   | 135.4   | -6.4  |
| Fnbp1    | 1426983_at   | formin binding protein 1                                            | 824.2   | 257.1   | -3.2  |
| Fndc1    | 1453321_at   | fibronectin type III domain containing 1                            | 767.9   | 216.9   | -3.5  |
| Fos11    | 1417487_at   | fos-like antigen 1                                                  | 84.7    | 626.2   | 7.4   |
| Foxa2    | 1422833_at   | forkhead box A2                                                     | 359.8   | 79.7    | -4.5  |
| Foxa3    | 1431900_a_at | forkhead box A3                                                     | 342.2   | 89.5    | -3.8  |
| Foxc1    | 1419486_at   | forkhead box C1                                                     | 48.1    | 516.9   | 10.7  |

|            |              |                                                                                   |         |        |       |
|------------|--------------|-----------------------------------------------------------------------------------|---------|--------|-------|
| Foxg1      | 1418357_at   | forkhead box G1                                                                   | 10.9    | 595.7  | 54.6  |
| Fpr2       | 1422953_at   | formyl peptide receptor 2                                                         | 25.6    | 598.9  | 23.4  |
| Fscn1      | 1416514_a_at | fascin homolog 1, actin bundling protein ( <i>Strongylocentrotus purpuratus</i> ) | 1851.4  | 6288.7 | 3.4   |
| Fst        | 1421365_at   | follicstatin                                                                      | 297.6   | 5370.1 | 18.0  |
| Fxyd1      | 1421374_a_at | FXYP domain-containing ion transport regulator 1                                  | 1714.6  | 192.7  | -8.9  |
| Fxyd4      | 1418207_at   | FXYP domain-containing ion transport regulator 4                                  | 54.3    | 763.7  | 14.1  |
| Fxyd6      | 1417343_at   | FXYP domain-containing ion transport regulator 6                                  | 904.2   | 186.4  | -4.8  |
| Fzd2       | 1418534_at   | frizzled homolog 2 ( <i>Drosophila</i> )                                          | 857.5   | 153.4  | -5.6  |
| Fzd4       | 1419301_at   | frizzled homolog 4 ( <i>Drosophila</i> )                                          | 794.2   | 214.6  | -3.7  |
| Gabrp      | 1424647_at   | gamma-aminobutyric acid (GABA) A receptor, pi                                     | 54.7    | 440.4  | 8.0   |
| Gal3st1    | 1454078_a_at | galactose-3-O-sulfotransferase 1                                                  | 1477.2  | 218.8  | -6.8  |
| Gast       | 1422915_at   | gastrin                                                                           | 6048.0  | 117.7  | -51.4 |
| Gc         | 1426547_at   | group specific component                                                          | 531.6   | 28.6   | -18.6 |
| Gda        | 1422868_s_at | guanine deaminase                                                                 | 65.9    | 587.3  | 8.9   |
| Gfpt1      | 1449268_at   | glutamine fructose-6-phosphate transaminase 1                                     | 93.0    | 404.1  | 4.3   |
| Ggta1      | 1418483_a_at | glycoprotein galactosyltransferase alpha 1, 3                                     | 468.7   | 1563.4 | 3.3   |
| Ghr        | 1417962_s_at | growth hormone receptor                                                           | 2106.6  | 620.5  | -3.4  |
| Gjb1       | 1448767_s_at | gap junction protein, beta 1                                                      | 729.9   | 144.6  | -5.0  |
| Gjb3       | 1416715_at   | gap junction protein, beta 3                                                      | 1721.6  | 363.4  | -4.7  |
| Gjb4       | 1422179_at   | gap junction protein, beta 4                                                      | 1015.1  | 329.9  | -3.1  |
| Gjb5       | 1449204_at   | gap junction protein, beta 5                                                      | 2146.5  | 270.0  | -8.0  |
| Gjc1       | 1449094_at   | gap junction protein, gamma 1                                                     | 463.8   | 119.7  | -3.9  |
| Gldc       | 1416049_at   | glycine decarboxylase                                                             | 1216.4  | 292.9  | -4.2  |
| Glycam1    | 1424825_a_at | glycosylation dependent cell adhesion molecule 1                                  | 1274.4  | 238.0  | -5.4  |
| Gnai1      | 1454959_s_at | guanine nucleotide binding protein (G protein), alpha inhibiting 1                | 5303.2  | 944.0  | -5.6  |
| Gp1bb      | 1422977_at   | glycoprotein Ib, beta polypeptide                                                 | 404.9   | 117.8  | -3.4  |
| Gpc3       | 1450990_at   | glypican 3                                                                        | 449.3   | 91.4   | -4.9  |
| Gpld1      | 1418050_at   | glycosylphosphatidylinositol specific phospholipase D1                            | 3748.4  | 957.6  | -3.9  |
| Gpm6a      | 1456741_s_at | glycoprotein m6a                                                                  | 463.7   | 75.8   | -6.1  |
| Gpm6b      | 1425942_a_at | glycoprotein m6b                                                                  | 651.8   | 199.9  | -3.3  |
| Gpr137b-ps | 1439256_x_at | G protein-coupled receptor 137B, pseudogene                                       | 536.8   | 1732.5 | 3.2   |
| Gpre5b     | 1451411_at   | G protein-coupled receptor, family C, group 5, member B                           | 124.0   | 515.7  | 4.2   |
| Grem2      | 1418492_at   | gremlin 2 homolog, cysteine knot superfamily ( <i>Xenopus laevis</i> )            | 1943.7  | 308.1  | -6.3  |
| Grp        | 1424525_at   | gastrin releasing peptide                                                         | 823.6   | 79.3   | -10.4 |
| Gsdma      | 1423634_at   | gasdermin A                                                                       | 4191.5  | 730.5  | -5.7  |
| Gsn        | 1415812_at   | gelsolin                                                                          | 14693.1 | 3444.7 | -4.3  |
| Gsr        | 1421817_at   | glutathione reductase                                                             | 714.2   | 3228.6 | 4.5   |
| Gstm1      | 1448330_at   | glutathione S-transferase, mu 1                                                   | 8688.6  | 1284.9 | -6.8  |
| Gstm2      | 1416411_at   | glutathione S-transferase, mu 2                                                   | 2388.2  | 335.6  | -7.1  |
| Gstm3      | 1427474_s_at | glutathione S-transferase, mu 3                                                   | 1125.7  | 133.1  | -8.5  |
| Gstm6      | 1422072_a_at | glutathione S-transferase, mu 6                                                   | 684.7   | 185.5  | -3.7  |
| Gstt1      | 1418186_at   | glutathione S-transferase, theta 1                                                | 945.4   | 181.8  | -5.2  |
| Gstt3      | 1423891_at   | glutathione S-transferase, theta 3                                                | 642.9   | 194.1  | -3.3  |
| Gucy1b3    | 1420872_at   | guanylate cyclase 1, soluble, beta 3                                              | 721.6   | 139.2  | -5.2  |
| H19        | 1448194_a_at | H19 fetal liver mRNA                                                              | 2519.6  | 599.3  | -4.2  |
| Has2       | 1418678_at   | hyaluronan synthase 2                                                             | 39.7    | 371.0  | 9.3   |
| Has3       | 1420589_at   | hyaluronan synthase 3                                                             | 96.9    | 920.2  | 9.5   |
| Havcr2     | 1451584_at   | hepatitis A virus cellular receptor 2                                             | 16.4    | 378.1  | 23.0  |
| Hbegf      | 1418350_at   | heparin-binding EGF-like growth factor                                            | 691.6   | 3186.4 | 4.6   |
| Hdc        | 1454713_s_at | histidine decarboxylase                                                           | 91.9    | 523.4  | 5.7   |
| Hipk2      | 1424863_a_at | homeodomain interacting protein kinase 2                                          | 861.8   | 225.0  | -3.8  |
| Hist1h4i   | 1424854_at   | histone cluster 1, H4i                                                            | 136.3   | 421.3  | 3.1   |
| Hk1        | 1420901_a_at | hexokinase 1                                                                      | 1704.9  | 523.6  | -3.3  |
| Hlf        | 1434736_at   | hepatic leukemia factor                                                           | 440.8   | 68.5   | -6.4  |
| Hmga1      | 1416184_s_at | high mobility group AT-hook 1                                                     | 733.8   | 3990.0 | 5.4   |
| Hmga2      | 1450780_s_at | high mobility group AT-hook 2                                                     | 58.5    | 4402.1 | 75.2  |
| Hmgb3      | 1416155_at   | high mobility group box 3                                                         | 318.9   | 1157.9 | 3.6   |
| Hnf4a      | 1427001_s_at | hepatic nuclear factor 4, alpha                                                   | 624.0   | 134.5  | -4.6  |
| Hnrnp1     | 1424101_at   | heterogeneous nuclear ribonucleoprotein L                                         | 289.6   | 993.2  | 3.4   |
| Homer2     | 1424367_a_at | homer homolog 2 ( <i>Drosophila</i> )                                             | 1934.1  | 407.3  | -4.7  |
| Hoxa5      | 1448926_at   | homeo box A5                                                                      | 300.7   | 56.9   | -5.3  |
| Hoxb6      | 1451660_a_at | homeo box B6                                                                      | 336.9   | 111.9  | -3.0  |
| Hoxc5      | 1450832_at   | homeo box C5                                                                      | 508.8   | 121.9  | -4.2  |
| Hp         | 1448881_at   | haptoglobin                                                                       | 220.7   | 1206.4 | 5.5   |
| Hpgd       | 1419905_s_at | hydroxyprostaglandin dehydrogenase 15 (NAD)                                       | 8217.3  | 2656.9 | -3.1  |
| Hpx        | 1423944_at   | hemopexin                                                                         | 439.7   | 83.4   | -5.3  |
| Hmr        | 1451613_at   | hornerin                                                                          | 10493.9 | 1550.9 | -6.8  |
| Hs3st1     | 1423450_a_at | heparan sulfate (glucosamine) 3-O-sulfotransferase 1                              | 215.8   | 763.6  | 3.5   |
| Hsd11b1    | 1449038_at   | hydroxysteroid 11-beta dehydrogenase 1                                            | 2193.5  | 603.9  | -3.6  |
| Hsd17b11   | 1434642_at   | hydroxysteroid (17-beta) dehydrogenase 11                                         | 4738.1  | 1490.9 | -3.2  |
| Hsd17b2    | 1418352_at   | hydroxysteroid (17-beta) dehydrogenase 2                                          | 4823.2  | 1554.0 | -3.1  |
| Hspb2      | 1429888_a_at | heat shock protein 2                                                              | 355.7   | 105.8  | -3.4  |
| Hspb7      | 1434927_at   | heat shock protein family, member 7 (cardiovascular)                              | 933.8   | 107.3  | -8.7  |

|         |              |                                                                                           |         |         |       |
|---------|--------------|-------------------------------------------------------------------------------------------|---------|---------|-------|
| Hspb8   | 1417013_at   | heat shock protein 8                                                                      | 2806.9  | 751.9   | -3.7  |
| Htra3   | 1419292_at   | HtrA serine peptidase 3                                                                   | 825.2   | 205.0   | -4.0  |
| Icam1   | 1424067_at   | intercellular adhesion molecule 1                                                         | 172.6   | 687.0   | 4.0   |
| Id4     | 1438441_at   | inhibitor of DNA binding 4                                                                | 317.7   | 43.9    | -7.2  |
| Iffo2   | 1426597_s_at | intermediate filament family orphan 2                                                     | 157.6   | 584.3   | 3.7   |
| Ifi202b | 1421551_s_at | interferon activated gene 202B                                                            | 335.3   | 4164.2  | 12.4  |
| Ifi204  | 1419603_at   | interferon activated gene 204                                                             | 42.4    | 354.4   | 8.4   |
| Ifitm6  | 1440865_at   | interferon induced transmembrane protein 6                                                | 38.8    | 363.0   | 9.3   |
| Igf2bp2 | 1437103_at   | insulin-like growth factor 2 mRNA binding protein 2                                       | 112.0   | 952.0   | 8.5   |
| Igfbp2  | 1454159_a_at | insulin-like growth factor binding protein 2                                              | 3635.9  | 483.7   | -7.5  |
| Igfbp3  | 1423062_at   | insulin-like growth factor binding protein 3                                              | 365.7   | 8666.4  | 23.7  |
| Igfbp5  | 1452114_s_at | insulin-like growth factor binding protein 5                                              | 3511.1  | 744.8   | -4.7  |
| Igfbp6  | 1417933_at   | insulin-like growth factor binding protein 6                                              | 1511.3  | 199.5   | -7.6  |
| Igj     | 1424305_at   | immunoglobulin joining chain                                                              | 108.3   | 2774.1  | 25.6  |
| Ig1-V1  | 1430523_s_at | immunoglobulin lambda chain, variable 1                                                   | 22.4    | 434.7   | 19.4  |
| Igsf8   | 1460675_at   | immunoglobulin superfamily, member 8                                                      | 291.4   | 960.2   | 3.3   |
| Il13ra1 | 1427164_at   | interleukin 13 receptor, alpha 1                                                          | 297.2   | 907.2   | 3.1   |
| Il17b   | 1431693_a_at | interleukin 17B                                                                           | 2044.6  | 148.7   | -13.7 |
| Il18    | 1417932_at   | interleukin 18                                                                            | 9188.7  | 2064.1  | -4.5  |
| Il1a    | 1421473_at   | interleukin 1 alpha                                                                       | 86.6    | 489.7   | 5.7   |
| Il1b    | 1449399_a_at | interleukin 1 beta                                                                        | 75.1    | 1569.4  | 20.9  |
| Il1f5   | 1421370_a_at | interleukin 1 family, member 5 (delta)                                                    | 12328.2 | 2197.7  | -5.6  |
| Il1f8   | 1425715_at   | interleukin 1 family, member 8                                                            | 3594.4  | 824.7   | -4.4  |
| Il1r1   | 1448950_at   | interleukin 1 receptor, type I                                                            | 249.2   | 1007.4  | 4.0   |
| Il24    | 1426181_a_at | interleukin 24                                                                            | 26.3    | 623.0   | 23.7  |
| Il4ra   | 1421034_a_at | interleukin 4 receptor, alpha                                                             | 261.3   | 857.1   | 3.3   |
| Il6     | 1450297_at   | interleukin 6                                                                             | 12.2    | 479.1   | 39.4  |
| Il6st   | 1460295_s_at | interleukin 6 signal transducer                                                           | 456.5   | 123.5   | -3.7  |
| Incenp  | 1439436_x_at | inner centromere protein                                                                  | 615.0   | 1920.6  | 3.1   |
| Isg20   | 1419569_a_at | interferon-stimulated protein                                                             | 429.3   | 1589.8  | 3.7   |
| Isl1    | 1450723_at   | ISL1 transcription factor, LIM/homeodomain                                                | 157.9   | 477.2   | 3.0   |
| Islr    | 1418450_at   | immunoglobulin superfamily containing leucine-rich repeat                                 | 1189.7  | 228.8   | -5.2  |
| Itga6   | 1422445_at   | integrin alpha 6                                                                          | 1327.7  | 3942.3  | 3.0   |
| Itga7   | 1418393_a_at | integrin alpha 7                                                                          | 322.3   | 88.9    | -3.6  |
| Itga9   | 1460285_at   | integrin alpha 9                                                                          | 723.6   | 185.1   | -3.9  |
| Itgb2   | 1450678_at   | integrin beta 2                                                                           | 172.5   | 846.9   | 4.9   |
| Itih5   | 1429159_at   | inter-alpha (globulin) inhibitor H5                                                       | 4824.4  | 795.2   | -6.1  |
| Iyd     | 1451547_at   | iodotyrosine deiodinase                                                                   | 480.6   | 153.4   | -3.1  |
| Kcnmb1  | 1421400_at   | potassium large conductance calcium-activated channel, subfamily M, beta member 1         | 585.4   | 80.7    | -7.3  |
| Kcnn4   | 1435945_a_at | potassium intermediate/small conductance calcium-activated channel, subfamily N, member 4 | 629.8   | 3143.5  | 5.0   |
| Kif20a  | 1449207_a_at | kinesin family member 20A                                                                 | 101.3   | 389.4   | 3.8   |
| Kif23   | 1455990_at   | kinesin family member 23                                                                  | 125.2   | 472.8   | 3.8   |
| Klf15   | 1448181_at   | Kruppel-like factor 15                                                                    | 383.1   | 96.2    | -4.0  |
| Klf9    | 1456341_a_at | Kruppel-like factor 9                                                                     | 2064.3  | 397.9   | -5.2  |
| Klhl13  | 1448269_a_at | kelch-like 13 (Drosophila)                                                                | 383.1   | 84.8    | -4.5  |
| Klk6    | 1448982_at   | kallikrein related-peptidase 6                                                            | 1047.3  | 3665.3  | 3.5   |
| Klra18  | 1426127_x_at | killer cell lectin-like receptor, subfamily A, member 18                                  | 310.5   | 4970.8  | 16.0  |
| Krt1    | 1422481_at   | keratin 1                                                                                 | 27917.1 | 8818.3  | -3.2  |
| Krt16   | 1448932_at   | keratin 16                                                                                | 86.8    | 10070.2 | 116.0 |
| Krt17   | 1423227_at   | keratin 17                                                                                | 227.1   | 3088.4  | 13.6  |
| Krt20   | 1426284_at   | keratin 20                                                                                | 1764.8  | 312.1   | -5.7  |
| Krt4    | 1418735_at   | keratin 4                                                                                 | 24449.9 | 7892.0  | -3.1  |
| Krt6a   | 1422784_at   | keratin 6A                                                                                | 241.2   | 20785.6 | 86.2  |
| Krt6b   | 1422588_at   | keratin 6B                                                                                | 2756.1  | 26108.4 | 9.5   |
| Krt7    | 1423952_a_at | keratin 7                                                                                 | 1225.9  | 7339.7  | 6.0   |
| Krt8    | 1420647_a_at | keratin 8                                                                                 | 16262.0 | 5042.4  | -3.2  |
| Lama2   | 1426285_at   | laminin, alpha 2                                                                          | 469.7   | 100.0   | -4.7  |
| Lama3   | 1427512_a_at | laminin, alpha 3                                                                          | 364.0   | 4147.6  | 11.4  |
| Lamb2   | 1416513_at   | laminin, beta 2                                                                           | 591.3   | 175.4   | -3.4  |
| Lamb3   | 1417812_a_at | laminin, beta 3                                                                           | 510.0   | 2377.1  | 4.7   |
| Lamc2   | 1421279_at   | laminin, gamma 2                                                                          | 544.3   | 3160.9  | 5.8   |
| Laptm5  | 1436905_x_at | lysosomal-associated protein transmembrane 5                                              | 564.3   | 1863.6  | 3.3   |
| Lce1a1  | 1420676_at   | late cornified envelope 1A1                                                               | 15801.0 | 3411.6  | -4.6  |
| Lce1a2  | 1420350_at   | late cornified envelope 1A2                                                               | 18579.5 | 5080.5  | -3.7  |
| Lce1b   | 1419409_at   | late cornified envelope 1B                                                                | 8715.4  | 1845.1  | -4.7  |
| Lce1g   | 1421316_at   | late cornified envelope 1G                                                                | 312.3   | 77.5    | -4.0  |
| Lce1h   | 1449959_x_at | late cornified envelope 1H                                                                | 20812.5 | 4605.1  | -4.5  |
| Lce1i   | 1420741_x_at | late cornified envelope 1I                                                                | 25792.0 | 6775.4  | -3.8  |
| Lce1l   | 1418855_at   | late cornified envelope 1L                                                                | 1186.9  | 192.0   | -6.2  |
| Lcn2    | 1427747_a_at | lipocalin 2                                                                               | 23.1    | 651.7   | 28.3  |
| Ldb2    | 1421101_a_at | LIM domain binding 2                                                                      | 643.0   | 171.9   | -3.7  |
| Lgals2  | 1417079_s_at | lectin, galactose-binding, soluble 2                                                      | 4724.2  | 957.7   | -4.9  |

|          |              |                                                                          |         |         |       |
|----------|--------------|--------------------------------------------------------------------------|---------|---------|-------|
| Lgals4   | 1451336_at   | lectin, galactose binding, soluble 4                                     | 2691.5  | 454.3   | -5.9  |
| Lgals7   | 1424594_at   | lectin, galactose binding, soluble 7                                     | 2224.7  | 386.1   | -5.8  |
| Lims2    | 1424408_at   | LIM and senescent cell antigen like domains 2                            | 2764.3  | 248.6   | -11.1 |
| Lmod1    | 1427485_at   | leiomodlin 1 (smooth muscle)                                             | 550.9   | 93.8    | -5.9  |
| Lnx1     | 1455825_s_at | ligand of numb-protein X 1                                               | 2248.2  | 492.9   | -4.6  |
| Lox      | 1416121_at   | lysyl oxidase                                                            | 464.3   | 1606.2  | 3.5   |
| Lpar1    | 1448606_at   | lysophosphatidic acid receptor 1                                         | 1303.3  | 318.4   | -4.1  |
| Lpcat1   | 1424459_at   | lysophosphatidylcholine acyltransferase 1                                | 202.3   | 683.5   | 3.4   |
| Lphn1    | 1428510_at   | latrophilin 1                                                            | 443.0   | 105.8   | -4.2  |
| Lpp      | 1454899_at   | LIM domain containing preferred translocation partner in lipoma          | 4363.3  | 1281.0  | -3.4  |
| Lst1     | 1425548_a_at | leukocyte specific transcript 1                                          | 102.9   | 456.9   | 4.4   |
| Ltbp2    | 1418061_at   | latent transforming growth factor beta binding protein 2                 | 30.6    | 337.9   | 11.0  |
| Ltbp4    | 1436665_a_at | latent transforming growth factor beta binding protein 4                 | 1323.8  | 418.5   | -3.2  |
| Ltf      | 1450009_at   | lactotransferrin                                                         | 163.3   | 21298.5 | 130.5 |
| Lxn      | 1416503_at   | latexin                                                                  | 733.0   | 3203.2  | 4.4   |
| Ly6g6c   | 1422749_at   | lymphocyte antigen 6 complex, locus G6C                                  | 11343.0 | 2714.6  | -4.2  |
| Ly86     | 1422903_at   | lymphocyte antigen 86                                                    | 157.6   | 631.8   | 4.0   |
| Lyz2     | 1423547_at   | lysozyme 2                                                               | 2122.7  | 8302.3  | 3.9   |
| MacroD1  | 1419687_at   | MACRO domain containing 1                                                | 565.8   | 179.4   | -3.2  |
| Mad211   | 1422460_at   | MAD2 mitotic arrest deficient-like 1 (yeast)                             | 348.6   | 1312.0  | 3.8   |
| Mafb     | 1451716_at   | v-maf musculoaponeurotic fibrosarcoma oncogene family, protein B (avian) | 210.4   | 626.0   | 3.0   |
| Mansc1   | 1423284_at   | MANSC domain containing 1                                                | 1204.6  | 249.0   | -4.8  |
| Map11c3a | 1451290_at   | microtubule-associated protein 1 light chain 3 alpha                     | 1241.2  | 419.9   | -3.0  |
| Mapre2   | 1451989_a_at | microtubule-associated protein, RP/EB family, member 2                   | 2834.2  | 600.2   | -4.7  |
| Marveld1 | 1439381_x_at | MARVEL (membrane-associating) domain containing 1                        | 8259.6  | 1750.8  | -4.7  |
| Matn2    | 1419442_at   | matrilin 2                                                               | 593.8   | 136.5   | -4.4  |
| Mb       | 1451203_at   | myoglobin                                                                | 64.3    | 609.1   | 9.5   |
| Mbnl3    | 1422836_at   | muscleblind-like 3 (Drosophila)                                          | 108.6   | 465.0   | 4.3   |
| Mboat2   | 1425029_a_at | membrane bound O-acyltransferase domain containing 2                     | 5457.6  | 1454.0  | -3.8  |
| Me2      | 1426573_at   | malic enzyme 2, NAD(+)-dependent, mitochondrial                          | 445.9   | 127.1   | -3.5  |
| Melk     | 1416558_at   | maternal embryonic leucine zipper kinase                                 | 171.2   | 526.0   | 3.1   |
| Mgll     | 1426785_s_at | monoglyceride lipase                                                     | 2072.8  | 516.2   | -4.0  |
| Mid2     | 1422216_at   | midline 2                                                                | 464.4   | 152.2   | -3.1  |
| Mmp10    | 1420450_at   | matrix metalloproteinase 10                                              | 31.6    | 498.1   | 15.8  |
| Mmp12    | 1449153_at   | matrix metalloproteinase 12                                              | 17.5    | 1820.9  | 104.1 |
| Mmp13    | 1417256_at   | matrix metalloproteinase 13                                              | 14.8    | 927.5   | 62.5  |
| Mmp3     | 1418945_at   | matrix metalloproteinase 3                                               | 51.8    | 483.2   | 9.3   |
| Mmp9     | 1448291_at   | matrix metalloproteinase 9                                               | 73.6    | 442.2   | 6.0   |
| Morc4    | 1434436_at   | microrchidia 4                                                           | 179.2   | 713.7   | 4.0   |
| Morf411  | 1437801_at   | mortality factor 4 like 1                                                | 1317.7  | 434.6   | -3.0  |
| Moxd1    | 1422643_at   | monooxygenase, DBH-like 1                                                | 196.6   | 3079.9  | 15.7  |
| Mpeg1    | 1427076_at   | macrophage expressed gene 1                                              | 294.3   | 1206.5  | 4.1   |
| Mrgprf   | 1425894_at   | MAS-related GPR, member F                                                | 581.2   | 66.7    | -8.7  |
| Mrv1     | 1422245_a_at | MRV integration site 1                                                   | 432.2   | 35.0    | -12.3 |
| Ms4a6b   | 1418826_at   | membrane-spanning 4-domains, subfamily A, member 6B                      | 209.7   | 669.3   | 3.2   |
| Ms4a6d   | 1419599_s_at | membrane-spanning 4-domains, subfamily A, member 6D                      | 91.0    | 960.8   | 10.6  |
| Ms4a7    | 1424754_at   | membrane-spanning 4-domains, subfamily A, member 7                       | 135.5   | 615.6   | 4.5   |
| Mt4      | 1450645_at   | metallothionein 4                                                        | 19576.1 | 6329.1  | -3.1  |
| Mtm1     | 1434278_at   | X-linked myotubular myopathy gene 1                                      | 426.0   | 1850.7  | 4.3   |
| Muc5ac   | 1430899_at   | mucin 5, subtypes A and C, tracheobronchial/gastric                      | 11100.2 | 668.6   | -16.6 |
| Mustn1   | 1427201_at   | musculoskeletal, embryonic nuclear protein 1                             | 573.0   | 138.1   | -4.1  |
| Mxra8    | 1452330_a_at | matrix-remodelling associated 8                                          | 2241.2  | 595.5   | -3.8  |
| Myh11    | 1448962_at   | myosin, heavy polypeptide 11, smooth muscle                              | 10900.9 | 795.0   | -13.7 |
| Myh9     | 1420170_at   | myosin, heavy polypeptide 9, non-muscle                                  | 265.4   | 854.3   | 3.2   |
| Myi1     | 1452651_a_at | myosin, light polypeptide 1                                              | 34.9    | 412.8   | 11.8  |
| Myi9     | 1452670_at   | myosin, light polypeptide 9, regulatory                                  | 20264.2 | 1625.2  | -12.5 |
| Mylk     | 1425506_at   | myosin, light polypeptide kinase                                         | 10372.5 | 1394.5  | -7.4  |
| Mylpf    | 1448371_at   | myosin light chain, phosphorylatable, fast skeletal muscle               | 72.6    | 440.8   | 6.1   |
| Myo1c    | 1449551_at   | myosin IC                                                                | 693.1   | 221.1   | -3.1  |
| Myo5c    | 1424933_at   | myosin VC                                                                | 606.9   | 182.2   | -3.3  |
| Myof     | 1427318_s_at | myoferlin                                                                | 628.0   | 2978.6  | 4.7   |
| Myom1    | 1420693_at   | myomesin 1                                                               | 361.5   | 57.3    | -6.3  |
| Ncald    | 1417569_at   | neurocalcin delta                                                        | 608.6   | 196.2   | -3.1  |
| Ncf4     | 1418465_at   | neutrophil cytosolic factor 4                                            | 105.4   | 539.3   | 5.1   |
| Ndn      | 1435382_at   | needin                                                                   | 1699.0  | 175.1   | -9.7  |
| NdrG1    | 1456174_x_at | N-myc downstream regulated gene 1                                        | 2059.4  | 7732.4  | 3.8   |
| NdrG4    | 1426615_s_at | N-myc downstream regulated gene 4                                        | 1450.5  | 321.9   | -4.5  |
| Nfix     | 1436363_a_at | nuclear factor I/X                                                       | 4120.9  | 1193.2  | -3.5  |
| Ngb      | 1417996_at   | neuroglobin                                                              | 411.4   | 98.7    | -4.2  |
| Nkd1     | 1417278_a_at | naked cuticle 1 homolog (Drosophila)                                     | 393.8   | 52.7    | -7.5  |
| Nmu      | 1419325_at   | neuromedin U                                                             | 6168.9  | 1301.5  | -4.7  |
| Npnt     | 1452106_at   | nephronectin                                                             | 2579.2  | 267.6   | -9.6  |

|          |              |                                                                              |        |         |       |
|----------|--------------|------------------------------------------------------------------------------|--------|---------|-------|
| Npr2     | 1427191_at   | natriuretic peptide receptor 2                                               | 373.9  | 94.8    | -3.9  |
| Nqo1     | 1423627_at   | NAD(P)H dehydrogenase, quinone 1                                             | 3244.8 | 917.3   | -3.5  |
| Nrbp2    | 1424544_at   | nuclear receptor binding protein 2                                           | 687.9  | 207.9   | -3.3  |
| Nrd1     | 1424391_at   | nardilysin, N-arginine dibasic convertase, NRD convertase 1                  | 4331.9 | 1405.6  | -3.1  |
| Nt5dc2   | 1424882_a_at | 5'-nucleotidase domain containing 2                                          | 90.0   | 652.0   | 7.2   |
| Ntn1     | 1454974_at   | netrin 1                                                                     | 561.6  | 108.4   | -5.2  |
| Nupr1    | 1419665_a_at | nuclear protein 1                                                            | 1129.7 | 5450.4  | 4.8   |
| Odc1     | 1427364_a_at | ornithine decarboxylase, structural 1                                        | 551.7  | 1798.0  | 3.3   |
| Ogn      | 1419663_at   | osteoglycin                                                                  | 6092.0 | 403.9   | -15.1 |
| Optc     | 1420578_at   | opticin                                                                      | 382.0  | 31.6    | -12.1 |
| Osbp11a  | 1460192_at   | oxysterol binding protein-like 1A                                            | 2835.9 | 566.8   | -5.0  |
| Otub2    | 1417575_at   | OTU domain, ubiquitin aldehyde binding 2                                     | 2586.9 | 810.6   | -3.2  |
| P2ry14   | 1424733_at   | purinergic receptor P2Y, G-protein coupled, 14                               | 560.1  | 112.0   | -5.0  |
| P2ry2    | 1450318_a_at | purinergic receptor P2Y, G-protein coupled 2                                 | 81.4   | 307.3   | 3.8   |
| Padi1    | 1419323_at   | peptidyl arginine deiminase, type I                                          | 204.1  | 941.2   | 4.6   |
| Padi3    | 1419767_at   | peptidyl arginine deiminase, type III                                        | 22.2   | 632.1   | 28.5  |
| Padi4    | 1422760_at   | peptidyl arginine deiminase, type IV                                         | 35.6   | 347.8   | 9.8   |
| Pah      | 1454638_a_at | phenylalanine hydroxylase                                                    | 358.9  | 20.9    | -17.2 |
| Pak1     | 1420979_at   | p21 protein (Cdc42/Rac)-activated kinase 1                                   | 161.0  | 616.4   | 3.8   |
| Parp8    | 1451474_a_at | poly (ADP-ribose) polymerase family, member 8                                | 149.5  | 614.9   | 4.1   |
| Pbk      | 1448627_s_at | PDZ binding kinase                                                           | 441.9  | 1362.0  | 3.1   |
| Pcdh7    | 1449249_at   | protocadherin 7                                                              | 114.3  | 900.4   | 7.9   |
| Pcolce   | 1437165_a_at | procollagen C-endopeptidase enhancer protein                                 | 3756.7 | 839.7   | -4.5  |
| Pcolce2  | 1451527_at   | procollagen C-endopeptidase enhancer 2                                       | 636.4  | 137.1   | -4.6  |
| Pcp4     | 1460214_at   | Purkinje cell protein 4                                                      | 313.1  | 52.5    | -6.0  |
| Pcp4l1   | 1452913_at   | Purkinje cell protein 4-like 1                                               | 457.5  | 44.4    | -10.3 |
| Pcsk6    | 1426981_at   | proprotein convertase subtilisin/kexin type 6                                | 1712.4 | 498.3   | -3.4  |
| Pcx      | 1416383_a_at | pyruvate carboxylase                                                         | 986.5  | 283.5   | -3.5  |
| Pdlim3   | 1449178_at   | PDZ and LIM domain 3                                                         | 4250.0 | 327.6   | -13.0 |
| Pdlim4   | 1417928_at   | PDZ and LIM domain 4                                                         | 704.4  | 161.5   | -4.4  |
| Pdlim5   | 1429783_at   | PDZ and LIM domain 5                                                         | 101.9  | 404.0   | 4.0   |
| Pdzrn3   | 1416846_a_at | PDZ domain containing RING finger 3                                          | 1960.4 | 396.3   | -4.9  |
| Peg3     | 1417355_at   | paternally expressed 3                                                       | 571.5  | 81.2    | -7.0  |
| Penk     | 1427038_at   | preproenkephalin                                                             | 777.9  | 226.7   | -3.4  |
| Pkfb3    | 1416432_at   | 6-phosphofructo-2-kinase/fructose-2,6-biphosphatase 3                        | 146.4  | 454.3   | 3.1   |
| Pga5     | 1421113_at   | pepsinogen 5, group I                                                        | 733.1  | 177.6   | -4.1  |
| Pgc      | 1415786_at   | progastricins (pepsinogen C)                                                 | 1236.8 | 286.3   | -4.3  |
| Pgcp     | 1416441_at   | plasma glutamate carboxypeptidase                                            | 860.1  | 251.5   | -3.4  |
| Pgf      | 1418471_at   | placental growth factor                                                      | 100.6  | 309.2   | 3.1   |
| Phlda1   | 1418835_at   | pleckstrin homology-like domain, family A, member 1                          | 1017.9 | 4029.1  | 4.0   |
| Pi15     | 1421403_at   | peptidase inhibitor 15                                                       | 76.2   | 437.2   | 5.7   |
| Pi16     | 1453839_a_at | peptidase inhibitor 16                                                       | 953.0  | 221.5   | -4.3  |
| Pitpnm2  | 1419757_at   | phosphatidylinositol transfer protein, membrane-associated 2                 | 318.2  | 73.4    | -4.3  |
| Pitx2    | 1424797_a_at | paired-like homeodomain transcription factor 2                               | 709.8  | 83.0    | -8.6  |
| Pkdcc    | 1454838_s_at | protein kinase domain containing, cytoplasmic                                | 1589.7 | 159.4   | -10.0 |
| Pla1a    | 1417785_at   | phospholipase A1 member A                                                    | 84.6   | 373.4   | 4.4   |
| Pla2g10  | 1451502_at   | phospholipase A2, group X                                                    | 1314.9 | 327.7   | -4.0  |
| Pla2g12b | 1419614_at   | phospholipase A2, group XIIB                                                 | 377.1  | 68.4    | -5.5  |
| Plagl1   | 1426208_x_at | pleiomorphic adenoma gene-like 1                                             | 8841.7 | 1661.8  | -5.3  |
| Plat     | 1415806_at   | plasminogen activator, tissue                                                | 298.1  | 7816.5  | 26.2  |
| Plaur    | 1452521_a_at | plasminogen activator, urokinase receptor                                    | 219.9  | 1089.1  | 5.0   |
| Plce1    | 1452398_at   | phospholipase C, epsilon 1                                                   | 484.8  | 98.1    | -4.9  |
| Plek     | 1448748_at   | pleckstrin                                                                   | 90.5   | 718.9   | 7.9   |
| Plekhh1  | 1435053_s_at | pleckstrin homology domain containing, family H (with MyTH4 domain) member 1 | 202.1  | 603.1   | 3.0   |
| Plin2    | 1448318_at   | perilipin 2                                                                  | 3418.2 | 12057.0 | 3.5   |
| Plin4    | 1418595_at   | perilipin 4                                                                  | 807.8  | 75.0    | -10.8 |
| Plk2     | 1427005_at   | polo-like kinase 2 (Drosophila)                                              | 473.1  | 3409.4  | 7.2   |
| Plk4     | 1419838_s_at | polo-like kinase 4 (Drosophila)                                              | 194.4  | 640.9   | 3.3   |
| Pln      | 1460332_at   | phospholamban                                                                | 1264.7 | 64.0    | -19.7 |
| Pls1     | 1460406_at   | plastin 1 (I-isoform)                                                        | 1419.8 | 415.0   | -3.4  |
| Pldc2    | 1418912_at   | plexin domain containing 2                                                   | 2073.8 | 646.7   | -3.2  |
| Pm20d1   | 1438980_x_at | peptidase M20 domain containing 1                                            | 307.9  | 87.7    | -3.5  |
| Pmaip1   | 1418203_at   | phorbol-12-myristate-13-acetate-induced protein 1                            | 136.7  | 3700.8  | 27.1  |
| Pmp22    | 1417133_at   | peripheral myelin protein 22                                                 | 2383.7 | 530.4   | -4.5  |
| Pnck     | 1422711_a_at | pregnancy upregulated non-ubiquitously expressed CaM kinase                  | 341.1  | 64.7    | -5.3  |
| Pnpla3   | 1420655_at   | patatin-like phospholipase domain containing 3                               | 415.9  | 130.9   | -3.2  |
| Popdc2   | 1417806_at   | popeye domain containing 2                                                   | 306.7  | 103.2   | -3.0  |
| Ppap2a   | 1422619_at   | phosphatidic acid phosphatase type 2A                                        | 2114.2 | 678.4   | -3.1  |
| Ppara    | 1449051_at   | peroxisome proliferator activated receptor alpha                             | 1227.4 | 143.0   | -8.6  |
| Pparg    | 1420715_a_at | peroxisome proliferator activated receptor gamma                             | 875.4  | 204.7   | -4.3  |
| Ppbb     | 1418480_at   | pro-platelet basic protein                                                   | 39.6   | 15481.6 | 391.2 |
| Ppp1r14a | 1418086_at   | protein phosphatase 1, regulatory (inhibitor) subunit 14A                    | 1713.9 | 83.0    | -20.7 |



|           |              |                                                              |         |         |       |
|-----------|--------------|--------------------------------------------------------------|---------|---------|-------|
| Ppp1r3c   | 1433691_at   | protein phosphatase 1, regulatory (inhibitor) subunit 3C     | 1233.0  | 148.3   | -8.3  |
| Prc1      | 1423774_a_at | protein regulator of cytokinesis 1                           | 138.2   | 534.6   | 3.9   |
| Prc1      | 1423775_s_at | protein regulator of cytokinesis 1                           | 258.3   | 901.1   | 3.5   |
| Prelp     | 1416321_s_at | proline arginine-rich end leucine-rich repeat                | 1997.8  | 393.4   | -5.1  |
| Prkg1     | 1449876_at   | protein kinase, cGMP-dependent, type I                       | 412.6   | 53.5    | -7.7  |
| Prkg2     | 1435162_at   | protein kinase, cGMP-dependent, type II                      | 319.9   | 2767.2  | 8.6   |
| Prss12    | 1420388_at   | protease, serine, 12 neurotrypsin (motopsin)                 | 136.5   | 889.0   | 6.5   |
| Prss22    | 1420352_at   | protease, serine, 22                                         | 76.5    | 2344.9  | 30.6  |
| Psap11    | 1429457_at   | prosaposin-like 1                                            | 12245.0 | 3733.9  | -3.3  |
| Psd       | 1435780_at   | pleckstrin and Sec7 domain containing                        | 538.0   | 139.9   | -3.8  |
| Psors1c2  | 1420467_at   | psoriasis susceptibility 1 candidate 2 (human)               | 492.6   | 145.3   | -3.4  |
| Psrc1     | 1417323_at   | proline/serine-rich coiled-coil 1                            | 87.7    | 308.9   | 3.5   |
| Pstpip2   | 1455405_at   | proline-serine-threonine phosphatase-interacting protein 2   | 126.6   | 611.3   | 4.8   |
| Ptger3    | 1450344_a_at | prostaglandin E receptor 3 (subtype EP3)                     | 601.9   | 136.3   | -4.4  |
| Ptges     | 1449450_at   | prostaglandin E synthase                                     | 136.9   | 1559.1  | 11.4  |
| Ptgis     | 1448816_at   | prostaglandin I2 (prostacyclin) synthase                     | 2020.9  | 361.1   | -5.6  |
| Ptgs1     | 1423414_at   | prostaglandin-endoperoxide synthase 1                        | 1635.4  | 471.5   | -3.5  |
| Ptgs2     | 1417262_at   | prostaglandin-endoperoxide synthase 2                        | 29.1    | 409.8   | 14.1  |
| Pthlh     | 1422324_a_at | parathyroid hormone-like peptide                             | 110.2   | 1716.8  | 15.6  |
| Ptms      | 1428707_at   | parathyromin                                                 | 2883.2  | 928.7   | -3.1  |
| Ptn       | 1448254_at   | pleiotrophin                                                 | 1677.2  | 462.0   | -3.6  |
| Ptprc     | 1422124_a_at | protein tyrosine phosphatase, receptor type, C               | 243.8   | 753.0   | 3.1   |
| Ptprz1    | 1427019_at   | protein tyrosine phosphatase, receptor type Z, polypeptide 1 | 378.6   | 2221.9  | 5.9   |
| Pttg1     | 1438390_s_at | pituitary tumor-transforming gene 1                          | 558.1   | 1839.5  | 3.3   |
| Purg      | 1424970_at   | purine-rich element binding protein G                        | 572.5   | 186.8   | -3.1  |
| Pvrl3     | 1448673_at   | poliovirus receptor-related 3                                | 383.3   | 78.3    | -4.9  |
| Pzp       | 1417246_at   | pregnancy zone protein                                       | 450.8   | 41.1    | -11.0 |
| Rab11fip5 | 1427405_s_at | RAB11 family interacting protein 5 (class I)                 | 152.3   | 474.8   | 3.1   |
| Rab17     | 1422178_a_at | RAB17, member RAS oncogene family                            | 78.5    | 321.4   | 4.1   |
| Rab31     | 1416165_at   | RAB31, member RAS oncogene family                            | 473.9   | 2080.3  | 4.4   |
| Rai14     | 1417400_at   | retinoic acid induced 14                                     | 926.3   | 2919.4  | 3.2   |
| Rarres2   | 1437902_s_at | retinoic acid receptor responder (tazarotene induced) 2      | 2562.5  | 676.6   | -3.8  |
| Rasd2     | 1427344_s_at | RASD family, member 2                                        | 346.1   | 59.7    | -5.8  |
| Rasl1b    | 1423854_a_at | RAS-like, family 11, member B                                | 1086.6  | 315.7   | -3.4  |
| Rbpms     | 1455936_a_at | RNA binding protein gene with multiple splicing              | 1001.4  | 318.1   | -3.1  |
| Rbpms2    | 1424008_a_at | RNA binding protein with multiple splicing 2                 | 1048.1  | 129.5   | -8.1  |
| Rcan2     | 1421425_a_at | regulator of calcineurin 2                                   | 3266.3  | 173.4   | -18.8 |
| Rcn3      | 1424382_at   | reticulocalbin 3, EF-hand calcium binding domain             | 1203.0  | 353.9   | -3.4  |
| Rdh12     | 1424256_at   | retinol dehydrogenase 12                                     | 3112.9  | 305.2   | -10.2 |
| Rdh9      | 1427963_s_at | retinol dehydrogenase 9                                      | 547.5   | 79.2    | -6.9  |
| Reck      | 1450784_at   | reversion-inducing-cysteine-rich protein with kazal motifs   | 973.6   | 96.9    | -10.1 |
| Reep1     | 1433509_s_at | receptor accessory protein 1                                 | 508.4   | 101.9   | -5.0  |
| Reln      | 1449465_at   | reelin                                                       | 302.9   | 85.1    | -3.6  |
| Rgl1      | 1449124_at   | ral guanine nucleotide dissociation stimulator,-like 1       | 325.1   | 87.6    | -3.7  |
| Rgs2      | 1419248_at   | regulator of G-protein signaling 2                           | 2281.3  | 639.0   | -3.6  |
| Rgs4      | 1416286_at   | regulator of G-protein signaling 4                           | 643.7   | 81.7    | -7.9  |
| Rgs5      | 1417466_at   | regulator of G-protein signaling 5                           | 13268.1 | 2769.3  | -4.8  |
| Rhbg      | 1419134_at   | Rhesus blood group-associated B glycoprotein                 | 1040.7  | 312.9   | -3.3  |
| Rhoj      | 1418892_at   | ras homolog gene family, member J                            | 1292.3  | 296.0   | -4.4  |
| Rhpn2     | 1434628_a_at | rhophilin, Rho GTPase binding protein 2                      | 1029.8  | 260.6   | -4.0  |
| Rin1      | 1424507_at   | Ras and Rab interactor 1                                     | 143.5   | 465.0   | 3.2   |
| Rnd3      | 1416700_at   | Rho family GTPase 3                                          | 398.0   | 1196.7  | 3.0   |
| Rod1      | 1424083_at   | ROD1 regulator of differentiation 1 (S. pombe)               | 335.4   | 1112.8  | 3.3   |
| Ror2      | 1423428_at   | receptor tyrosine kinase-like orphan receptor 2              | 363.4   | 83.4    | -4.4  |
| Rora      | 1424034_at   | RAR-related orphan receptor alpha                            | 1229.7  | 285.1   | -4.3  |
| Rras2     | 1417398_at   | related RAS viral (r-ras) oncogene homolog 2                 | 507.1   | 2211.9  | 4.4   |
| Rrm2      | 1448226_at   | ribonucleotide reductase M2                                  | 526.6   | 1962.4  | 3.7   |
| Rtp4      | 1418580_at   | receptor transporter protein 4                               | 208.8   | 664.5   | 3.2   |
| Runx1     | 1422864_at   | runt related transcription factor 1                          | 86.6    | 1377.3  | 15.9  |
| Runx2     | 1424704_at   | runt related transcription factor 2                          | 58.4    | 1095.5  | 18.7  |
| S100a10   | 1416762_at   | S100 calcium binding protein A10 (calpactin)                 | 2614.0  | 8840.2  | 3.4   |
| S100a3    | 1421856_at   | S100 calcium binding protein A3                              | 35.1    | 620.7   | 17.7  |
| S100a8    | 1419394_s_at | S100 calcium binding protein A8 (calgranulin A)              | 57.0    | 13047.8 | 229.0 |
| S100a9    | 1448756_at   | S100 calcium binding protein A9 (calgranulin B)              | 240.6   | 17942.3 | 74.6  |
| S1pr5     | 1449365_at   | sphingosine-1-phosphate receptor 5                           | 558.3   | 133.0   | -4.2  |
| Saa3      | 1450826_a_at | serum amyloid A 3                                            | 117.4   | 12750.9 | 108.6 |
| Samhd1    | 1418131_at   | SAM domain and HD domain, 1                                  | 449.2   | 1947.4  | 4.3   |
| Sat1      | 1420502_at   | spermidine/spermine N1-acetyl transferase 1                  | 2033.4  | 8609.3  | 4.2   |
| Scara5    | 1451204_at   | scavenger receptor class A, member 5 (putative)              | 2088.4  | 657.5   | -3.2  |
| Scd2      | 1415823_at   | stearoyl-Coenzyme A desaturase 2                             | 788.5   | 3310.5  | 4.2   |
| Scg2      | 1450708_at   | secretogranin II                                             | 328.7   | 37.1    | -8.9  |
| Scgb1a1   | 1452543_a_at | secretoglobin, family 1A, member 1 (uteroglobin)             | 4418.7  | 401.0   | -11.0 |

|           |              |                                                                                                   |         |         |       |
|-----------|--------------|---------------------------------------------------------------------------------------------------|---------|---------|-------|
| Scin      | 1450276_a_at | scinderin                                                                                         | 62.0    | 656.2   | 10.6  |
| Sdc2      | 1448545_at   | syndecan 2                                                                                        | 1316.1  | 334.1   | -3.9  |
| Sdpr      | 1416778_at   | serum deprivation response                                                                        | 3092.7  | 330.7   | -9.4  |
| Sec1411   | 1453412_a_at | SEC14-like 1 ( <i>S. cerevisiae</i> )                                                             | 1181.7  | 382.1   | -3.1  |
| Selm      | 1424394_at   | selenoprotein M                                                                                   | 1392.8  | 366.3   | -3.8  |
| Sema3e    | 1419717_at   | sema domain, immunoglobulin domain (Ig), short basic domain, secreted, (semaphorin) 3E            | 944.6   | 182.8   | -5.2  |
| Serpina12 | 1421092_at   | serine (or cysteine) peptidase inhibitor, clade A (alpha-1 antitrypsin, antitrypsin), member 12   | 6918.5  | 1099.4  | -6.3  |
| Serpina1a | 1420553_x_at | serine (or cysteine) peptidase inhibitor, clade A, member 1A                                      | 429.1   | 14.0    | -30.6 |
| Serpina1b | 1418282_x_at | serine (or cysteine) peptidase inhibitor, clade A, member 1B                                      | 667.1   | 158.8   | -4.2  |
| Serpina3k | 1423866_at   | serine (or cysteine) peptidase inhibitor, clade A, member 3K                                      | 1186.0  | 23.8    | -49.8 |
| Serpina3n | 1419100_at   | serine (or cysteine) peptidase inhibitor, clade A, member 3N                                      | 371.6   | 1996.9  | 5.4   |
| Serpinb6b | 1422804_at   | serine (or cysteine) peptidase inhibitor, clade B, member 6b                                      | 244.5   | 787.9   | 3.2   |
| Serpinb6c | 1451594_s_at | serine (or cysteine) peptidase inhibitor, clade B, member 6c                                      | 34.8    | 307.5   | 8.8   |
| Serpinb7  | 1449500_at   | serine (or cysteine) peptidase inhibitor, clade B, member 7                                       | 2546.6  | 135.0   | -18.9 |
| Serpinc1  | 1417909_at   | serine (or cysteine) peptidase inhibitor, clade C (antithrombin), member 1                        | 337.6   | 64.8    | -5.2  |
| Serpine1  | 1419149_at   | serine (or cysteine) peptidase inhibitor, clade E, member 1                                       | 82.9    | 2073.5  | 25.0  |
| Serpine2  | 1416666_at   | serine (or cysteine) peptidase inhibitor, clade E, member 2                                       | 1078.3  | 3347.6  | 3.1   |
| Sfrp2     | 1448201_at   | secreted frizzled-related protein 2                                                               | 2178.8  | 164.3   | -13.3 |
| Sgce      | 1420688_a_at | sarcoglycan, epsilon                                                                              | 881.9   | 150.4   | -5.9  |
| Sgp11     | 1415893_at   | sphingosine phosphate lyase 1                                                                     | 806.4   | 268.6   | -3.0  |
| Sh3bgr    | 1422644_at   | SH3-binding domain glutamic acid-rich protein                                                     | 1374.4  | 102.7   | -13.4 |
| Sh3gl2    | 1418791_at   | SH3-domain GRB2-like 2                                                                            | 627.9   | 107.4   | -5.8  |
| Shcgp1    | 1416299_at   | Shc SH2-domain binding protein 1                                                                  | 218.7   | 840.0   | 3.8   |
| Sla       | 1420819_at   | src-like adaptor                                                                                  | 118.4   | 373.5   | 3.2   |
| Slc15a1   | 1419343_at   | solute carrier family 15 (oligopeptide transporter), member 1                                     | 350.8   | 85.5    | -4.1  |
| Slc20a1   | 1448568_a_at | solute carrier family 20, member 1                                                                | 536.5   | 1665.1  | 3.1   |
| Slc22a23  | 1453004_at   | solute carrier family 22, member 23                                                               | 2716.4  | 868.8   | -3.1  |
| Slc25a24  | 1427483_at   | solute carrier family 25 (mitochondrial carrier, phosphate carrier), member 24                    | 217.0   | 841.0   | 3.9   |
| Slc2a1    | 1426599_a_at | solute carrier family 2 (facilitated glucose transporter), member 1                               | 1843.9  | 7547.0  | 4.1   |
| Slc2a4    | 1415958_at   | solute carrier family 2 (facilitated glucose transporter), member 4                               | 539.4   | 158.4   | -3.4  |
| Slc38a1   | 1415903_at   | solute carrier family 38, member 1                                                                | 521.2   | 171.5   | -3.0  |
| Slc46a1   | 1426714_at   | solute carrier family 46, member 1                                                                | 637.8   | 148.1   | -4.3  |
| Slc46a2   | 1423476_at   | solute carrier family 46, member 2                                                                | 2266.0  | 352.1   | -6.4  |
| Slc6a14   | 1420503_at   | solute carrier family 6 (neurotransmitter transporter), member 14                                 | 46.4    | 728.4   | 15.7  |
| Slc6a20a  | 1427221_at   | solute carrier family 6 (neurotransmitter transporter), member 20A                                | 250.6   | 851.5   | 3.4   |
| Slc7a8    | 1417929_at   | solute carrier family 7 (cationic amino acid transporter, y+ system), member 8                    | 103.8   | 484.0   | 4.7   |
| Slnf4     | 1427102_at   | schlafen 4                                                                                        | 22.0    | 561.4   | 25.5  |
| Smardc3   | 1418467_at   | SWI/SNF related, matrix associated, actin dependent regulator of chromatin, subfamily d, member 3 | 435.5   | 77.6    | -5.6  |
| Smoc2     | 1415935_at   | SPARC related modular calcium binding 2                                                           | 1172.8  | 281.8   | -4.2  |
| Smox      | 1424268_at   | spermine oxidase                                                                                  | 513.0   | 1988.3  | 3.9   |
| Smpd1     | 1448621_a_at | sphingomyelin phosphodiesterase 1, acid lysosomal                                                 | 6504.0  | 1680.0  | -3.9  |
| Smpd3     | 1422779_at   | sphingomyelin phosphodiesterase 3, neutral                                                        | 652.9   | 154.6   | -4.2  |
| Smtn      | 1452469_a_at | smoothelin                                                                                        | 2843.9  | 353.9   | -8.0  |
| Snai2     | 1418673_at   | snail homolog 2 ( <i>Drosophila</i> )                                                             | 150.3   | 448.8   | 3.0   |
| Sntg2     | 1418789_at   | syntrophin, gamma 2                                                                               | 667.8   | 51.3    | -13.0 |
| Snx10     | 1431055_a_at | sorting nexin 10                                                                                  | 254.3   | 800.6   | 3.1   |
| Socs3     | 1455899_x_at | suppressor of cytokine signaling 3                                                                | 720.3   | 2514.6  | 3.5   |
| Sorcs2    | 1419358_at   | sortilin-related VPS10 domain containing receptor 2                                               | 103.2   | 343.5   | 3.3   |
| Sostdc1   | 1449340_at   | sclerostin domain containing 1                                                                    | 90.5    | 563.1   | 6.2   |
| Sox6      | 1427677_a_at | SRY-box containing gene 6                                                                         | 364.8   | 81.4    | -4.5  |
| Sox9      | 1424950_at   | SRY-box containing gene 9                                                                         | 65.3    | 405.8   | 6.2   |
| Sparcl1   | 1416114_at   | SPARC-like 1                                                                                      | 11730.0 | 1590.3  | -7.4  |
| Spats21   | 1425913_a_at | spermatogenesis associated, serine-rich 2-like                                                    | 947.9   | 242.0   | -3.9  |
| Spc25     | 1424118_a_at | SPC25, NDC80 kinetochore complex component, homolog ( <i>S. cerevisiae</i> )                      | 192.9   | 577.8   | 3.0   |
| Speg      | 1448664_a_at | SPEG complex locus                                                                                | 635.8   | 72.6    | -8.8  |
| Spp1      | 1449254_at   | secreted phosphoprotein 1                                                                         | 1267.2  | 7091.8  | 5.6   |
| Sprr1b    | 1422672_at   | small proline-rich protein 1B                                                                     | 244.1   | 6903.4  | 28.3  |
| Sprr2f    | 1449833_at   | small proline-rich protein 2F                                                                     | 180.3   | 10147.4 | 56.3  |
| Sprr2h    | 1422240_s_at | small proline-rich protein 2H                                                                     | 115.7   | 9786.3  | 84.6  |
| Sprr2k    | 1422425_at   | small proline-rich protein 2K                                                                     | 327.4   | 1475.0  | 4.5   |
| Srgn      | 1417426_at   | serglycin                                                                                         | 1007.6  | 8887.1  | 8.8   |
| Srpx      | 1451939_a_at | sushi-repeat-containing protein                                                                   | 463.7   | 103.4   | -4.5  |
| Sspn      | 1417644_at   | sarcospan                                                                                         | 727.7   | 188.6   | -3.9  |
| St3gal4   | 1425668_a_at | ST3 beta-galactoside alpha-2,3-sialyltransferase 4                                                | 53.0    | 852.7   | 16.1  |
| Star      | 1418728_at   | steroidogenic acute regulatory protein                                                            | 451.4   | 108.9   | -4.1  |
| Stard5    | 1422821_s_at | STAR-related lipid transfer (START) domain containing 5                                           | 1900.4  | 591.7   | -3.2  |
| Stfa3     | 1419709_at   | stefin A3                                                                                         | 104.2   | 3573.4  | 34.3  |
| Stk39     | 1419551_s_at | serine/threonine kinase 39, STE20/SPS1 homolog (yeast)                                            | 460.7   | 1532.0  | 3.3   |
| Stom      | 1438910_a_at | stomatin                                                                                          | 947.1   | 4707.9  | 5.0   |
| Stra6     | 1422723_at   | stimulated by retinoic acid gene 6                                                                | 43.8    | 383.3   | 8.8   |
| Sult1a1   | 1427345_a_at | sulfotransferase family 1A, phenol-preferring, member 1                                           | 434.9   | 138.6   | -3.1  |
| Sult1b1   | 1418940_at   | sulfotransferase family 1B, member 1                                                              | 617.9   | 156.8   | -3.9  |

|          |              |                                                               |         |        |       |
|----------|--------------|---------------------------------------------------------------|---------|--------|-------|
| Sult1c2  | 1449409_at   | sulfotransferase family, cytosolic, 1C, member 2              | 4361.1  | 1124.6 | -3.9  |
| Sult1d1  | 1448973_at   | sulfotransferase family 1D, member 1                          | 1812.0  | 377.2  | -4.8  |
| Suox     | 1451339_at   | sulfite oxidase                                               | 1135.7  | 255.9  | -4.4  |
| Susd2    | 1426511_at   | sushi domain containing 2                                     | 638.3   | 111.5  | -5.7  |
| Svil     | 1460694_s_at | supervillin                                                   | 3388.9  | 1100.8 | -3.1  |
| Syncrip  | 1422768_at   | synaptotagmin binding, cytoplasmic RNA interacting protein    | 144.7   | 500.4  | 3.5   |
| Synpo2   | 1450828_at   | synaptopodin 2                                                | 352.2   | 111.1  | -3.2  |
| Syt12    | 1421594_a_at | synaptotagmin-like 2                                          | 1095.6  | 237.4  | -4.6  |
| Tac1     | 1416783_at   | tachykinin 1                                                  | 1135.4  | 98.0   | -11.6 |
| Tacc3    | 1417450_a_at | transforming, acidic coiled-coil containing protein 3         | 109.3   | 490.0  | 4.5   |
| Tagln    | 1423505_at   | transgelin                                                    | 24173.5 | 2523.7 | -9.6  |
| Tceal1   | 1424634_at   | transcription elongation factor A (SII)-like 1                | 343.2   | 94.6   | -3.6  |
| Tcf21    | 1417447_at   | transcription factor 21                                       | 899.9   | 135.5  | -6.6  |
| Tcf23    | 1421078_at   | transcription factor 23                                       | 1284.9  | 386.1  | -3.3  |
| Tex15    | 1420719_at   | testis expressed gene 15                                      | 125.9   | 517.0  | 4.1   |
| Tgfb1i1  | 1418136_at   | transforming growth factor beta 1 induced transcript 1        | 1690.6  | 190.3  | -8.9  |
| Tgif1    | 1422286_a_at | TGFB-induced factor homeobox 1                                | 270.7   | 1055.5 | 3.9   |
| Tgm2     | 1433428_x_at | transglutaminase 2, C polypeptide                             | 5851.7  | 1733.3 | -3.4  |
| Tgm3     | 1421355_at   | transglutaminase 3, E polypeptide                             | 1745.4  | 267.4  | -6.5  |
| Thbs1    | 1460302_at   | thrombospondin 1                                              | 244.2   | 1845.4 | 7.6   |
| Thbs3    | 1416623_at   | thrombospondin 3                                              | 304.6   | 39.1   | -7.8  |
| Thoc4    | 1417724_at   | THO complex 4                                                 | 326.6   | 995.3  | 3.0   |
| Thop1    | 1448907_at   | thimet oligopeptidase 1                                       | 2296.2  | 369.8  | -6.2  |
| Thrsp    | 1424737_at   | thyroid hormone responsive SPOT14 homolog (Rattus)            | 342.0   | 25.1   | -13.6 |
| Timp1    | 1460227_at   | tissue inhibitor of metalloproteinase 1                       | 122.2   | 2287.1 | 18.7  |
| Timp2    | 1433662_s_at | tissue inhibitor of metalloproteinase 2                       | 4173.2  | 1088.4 | -3.8  |
| Tln1     | 1448402_at   | talin 1                                                       | 1406.8  | 461.3  | -3.1  |
| Tm4sf1   | 1450958_at   | transmembrane 4 superfamily member 1                          | 852.5   | 5372.4 | 6.3   |
| Tm4sf5   | 1424445_at   | transmembrane 4 superfamily member 5                          | 480.9   | 108.4  | -4.4  |
| Tmcc3    | 1451794_at   | transmembrane and coiled coil domains 3                       | 1015.8  | 264.7  | -3.8  |
| Tmem47   | 1420514_at   | transmembrane protein 47                                      | 1498.3  | 289.1  | -5.2  |
| Tmigd1   | 1419498_at   | transmembrane and immunoglobulin domain containing 1          | 267.1   | 2705.1 | 10.1  |
| Tnfaip2  | 1438855_x_at | tumor necrosis factor, alpha-induced protein 2                | 637.7   | 3160.3 | 5.0   |
| Tnfrsf19 | 1448147_at   | tumor necrosis factor receptor superfamily, member 19         | 1020.1  | 215.4  | -4.7  |
| Tnfrsf22 | 1426095_a_at | tumor necrosis factor receptor superfamily, member 22         | 95.8    | 394.2  | 4.1   |
| Tnnc2    | 1417464_at   | troponin C2, fast                                             | 25.5    | 861.4  | 33.8  |
| Tnnt2    | 1418726_a_at | troponin T2, cardiac                                          | 159.0   | 779.7  | 4.9   |
| Tns1     | 1419283_s_at | tensin 1                                                      | 4418.9  | 298.4  | -14.8 |
| Tnxb     | 1450798_at   | tenascin XB                                                   | 742.7   | 74.1   | -10.0 |
| Top2a    | 1454694_a_at | topoisomerase (DNA) II alpha                                  | 537.3   | 1818.7 | 3.4   |
| Tpbp     | 1423310_at   | trophoblast glycoprotein                                      | 135.7   | 589.6  | 4.3   |
| Tpm1     | 1423721_at   | tropomyosin 1, alpha                                          | 15625.4 | 4467.7 | -3.5  |
| Tpp2     | 1430575_a_at | tripeptidyl peptidase II                                      | 322.1   | 70.6   | -4.6  |
| Tppp3    | 1416713_at   | tubulin polymerization-promoting protein family member 3      | 2064.0  | 99.2   | -20.8 |
| Tpx2     | 1428104_at   | TPX2, microtubule-associated protein homolog (Xenopus laevis) | 107.2   | 445.4  | 4.2   |
| Trib2    | 1426640_s_at | tribbles homolog 2 (Drosophila)                               | 196.8   | 759.5  | 3.9   |
| Trip13   | 1429295_s_at | thyroid hormone receptor interactor 13                        | 261.9   | 918.1  | 3.5   |
| Tspan13  | 1418643_at   | tetraspanin 13                                                | 3639.3  | 1070.6 | -3.4  |
| Tspan15  | 1424653_at   | tetraspanin 15                                                | 664.9   | 204.4  | -3.3  |
| Tspan2   | 1424567_at   | tetraspanin 2                                                 | 1422.0  | 183.5  | -7.8  |
| Tspan8   | 1420019_at   | tetraspanin 8                                                 | 569.6   | 162.5  | -3.5  |
| Tspy14   | 1424029_at   | TSPY-like 4                                                   | 1032.2  | 124.9  | -8.3  |
| Tst      | 1448609_at   | thiosulfate sulfurtransferase, mitochondrial                  | 2439.6  | 485.8  | -5.0  |
| Ttc28    | 1419584_at   | tetratricopeptide repeat domain 28                            | 548.0   | 116.4  | -4.7  |
| Ttc36    | 1418696_at   | tetratricopeptide repeat domain 36                            | 91.4    | 317.9  | 3.5   |
| Ttpa     | 1427284_a_at | tocopherol (alpha) transfer protein                           | 539.4   | 105.3  | -5.1  |
| Ttr      | 1454608_x_at | transthyretin                                                 | 1929.3  | 222.8  | -8.7  |
| Tug1     | 1456398_at   | taurine upregulated gene 1                                    | 321.4   | 90.7   | -3.5  |
| Tyrobp   | 1450792_at   | TYRO protein tyrosine kinase binding protein                  | 420.9   | 2361.6 | 5.6   |
| Ube2c    | 1452954_at   | ubiquitin-conjugating enzyme E2C                              | 405.3   | 1756.6 | 4.3   |
| Ubl7     | 1451465_at   | ubiquitin-like 7 (bone marrow stromal cell-derived)           | 319.2   | 89.4   | -3.6  |
| Ugrt2b34 | 1427961_s_at | UDP glucuronosyltransferase 2 family, polypeptide B34         | 2182.4  | 446.9  | -4.9  |
| Uox      | 1422604_at   | urate oxidase                                                 | 114.4   | 406.0  | 3.5   |
| Upk3b    | 1454881_s_at | uroplakin 3B                                                  | 528.0   | 56.6   | -9.3  |
| Upp1     | 1448562_at   | uridine phosphorylase 1                                       | 260.1   | 3358.3 | 12.9  |
| Usp2     | 1417168_a_at | ubiquitin specific peptidase 2                                | 552.7   | 61.7   | -9.0  |
| Vamp5    | 1430522_a_at | vesicle-associated membrane protein 5                         | 220.9   | 1586.1 | 7.2   |
| Vasn     | 1455812_x_at | vasorin                                                       | 2590.3  | 845.4  | -3.1  |
| Vcam1    | 1448162_at   | vascular cell adhesion molecule 1                             | 120.5   | 431.3  | 3.6   |
| Vegfa    | 1420909_at   | vascular endothelial growth factor A                          | 250.6   | 1064.6 | 4.2   |
| Vegfb    | 1451803_a_at | vascular endothelial growth factor B                          | 482.9   | 153.4  | -3.1  |
| Vil1     | 1448837_at   | villin 1                                                      | 351.2   | 48.8   | -7.2  |

|        |              |                                                               |        |        |      |
|--------|--------------|---------------------------------------------------------------|--------|--------|------|
| Vip    | 1428664_at   | vasoactive intestinal polypeptide                             | 913.2  | 216.3  | -4.2 |
| Vnn1   | 1418486_at   | vanin 1                                                       | 1264.5 | 7278.7 | 5.8  |
| Vsig2  | 1422634_a_at | V-set and immunoglobulin domain containing 2                  | 1384.3 | 386.1  | -3.6 |
| Vsn1   | 1420955_at   | visinin-like 1                                                | 194.0  | 670.1  | 3.5  |
| Wfdc1  | 1431335_a_at | WAP four-disulfide core domain 1                              | 1023.3 | 225.3  | -4.5 |
| Wfdc2  | 1424351_at   | WAP four-disulfide core domain 2                              | 543.1  | 6500.7 | 12.0 |
| Wnk2   | 1453355_at   | WNK lysine deficient protein kinase 2                         | 387.1  | 81.6   | -4.7 |
| Wnk4   | 1427196_at   | WNK lysine deficient protein kinase 4                         | 595.0  | 149.8  | -4.0 |
| Wnt5a  | 1436791_at   | wingless-related MMTV integration site 5A                     | 135.7  | 534.4  | 3.9  |
| Zbtb20 | 1438443_at   | zinc finger and BTB domain containing 20                      | 790.6  | 184.8  | -4.3 |
| Zeb1   | 1418926_at   | zinc finger E-box binding homeobox 1                          | 1205.9 | 346.5  | -3.5 |
| Zfp52  | 1426471_at   | zinc finger protein 52                                        | 344.6  | 1730.5 | 5.0  |
| Zfp574 | 1434128_a_at | zinc finger protein 574                                       | 923.4  | 308.0  | -3.0 |
| Zfp7   | 1451323_at   | zinc finger protein 7                                         | 118.5  | 377.0  | 3.2  |
| Zfp772 | 1460381_at   | zinc finger protein 772                                       | 806.6  | 262.7  | -3.1 |
| Zfpm2  | 1449314_at   | zinc finger protein, multitype 2                              | 363.0  | 42.5   | -8.5 |
| Zranb1 | 1415712_at   | zinc finger, RAN-binding domain containing 1                  | 978.0  | 317.6  | -3.1 |
| Zwilch | 1416757_at   | Zwilch, kinetochore associated, homolog ( <i>Drosophila</i> ) | 99.7   | 350.8  | 3.5  |
