# Supplementary material for: Induction of Metastatic Gastric Cancer by Peroxisome Proliferator-Activated Receptorδ Activation
Source: Hindawi journal article supplement (doi:10.1155/2010/571783), 2010-01-01
Supplement: f3 [file 571783.f3.pdf]

**TABLE S3. Differentially expressed genes in the stomach after GW501516 treatment compared to untreated stomach**

| Gene Symbol | Probe set    | Gene Name                                                                  | Stomach | +GW501516 | Fold Change |
|-------------|--------------|----------------------------------------------------------------------------|---------|-----------|-------------|
| Adipoq      | 1422651_at   | adiponectin, C1Q and collagen domain containing                            | 337.6   | 923.8     | 3.0         |
| Agr2        | 1419268_at   | anterior gradient 2 ( <i>Xenopus laevis</i> )                              | 5897.7  | 923.4     | -6.4        |
| Alb         | 1425260_at   | albumin                                                                    | 6338.0  | 953.9     | -6.6        |
| Angptl4     | 1417130_s_at | angiopoietin-like 4                                                        | 272.6   | 766.5     | 3.0         |
| Apoa2       | 1417950_a_at | apolipoprotein A-II                                                        | 630.5   | 136.3     | -4.6        |
| Apoh        | 1416677_at   | apolipoprotein H                                                           | 540.8   | 126.0     | -4.3        |
| Avil        | 1419148_at   | advillin                                                                   | 1430.4  | 433.5     | -3.3        |
| Cela1       | 1423693_at   | chymotrypsin-like elastase family, member 1                                | 4573.7  | 351.4     | -13.0       |
| Cfd         | 1417867_at   | complement factor D (adipsin)                                              | 310.2   | 875.6     | 3.0         |
| Chgb        | 1415885_at   | chromogranin B                                                             | 1117.8  | 165.9     | -6.7        |
| Chi3l4      | 1425450_at   | chitinase 3-like 4                                                         | 476.3   | 1200.6    | 3.0         |
| Clca3       | 1416306_at   | chloride channel calcium activated 3                                       | 2163.8  | 39.4      | -54.9       |
| Cldn18      | 1449428_at   | claudin 18                                                                 | 3103.4  | 963.7     | -3.2        |
| Cldn2       | 1417231_at   | claudin 2                                                                  | 572.0   | 46.2      | -12.4       |
| Cpn1        | 1417745_at   | carboxypeptidase N, polypeptide 1                                          | 313.3   | 55.3      | -5.7        |
| Cyp2b10     | 1425645_s_at | cytochrome P450, family 2, subfamily b, polypeptide 10                     | 100.6   | 344.6     | 3.4         |
| Cyp3a11     | 1416809_at   | cytochrome P450, family 3, subfamily a, polypeptide 11                     | 497.9   | 49.2      | -10.1       |
| Dmbt1       | 1418287_a_at | deleted in malignant brain tumors 1                                        | 2654.7  | 288.4     | -9.2        |
| Fabp2       | 1418438_at   | fatty acid binding protein 2, intestinal                                   | 1999.0  | 209.4     | -9.5        |
| Fcgbp       | 1426872_at   | Fc fragment of IgG binding protein                                         | 652.8   | 128.8     | -5.1        |
| Foxa2       | 1422833_at   | forkhead box A2                                                            | 359.8   | 116.7     | -3.1        |
| Gast        | 1422915_at   | gastrin                                                                    | 6048.0  | 56.8      | -106.5      |
| Gc          | 1426547_at   | group specific component                                                   | 531.6   | 71.4      | -7.4        |
| Gcnt3       | 1424901_at   | glucosaminyl (N-acetyl) transferase 3, mucin type                          | 791.1   | 211.1     | -3.7        |
| Glycam1     | 1424825_a_at | glycosylation dependent cell adhesion molecule 1                           | 1274.4  | 29.6      | -43.1       |
| Gstm3       | 1427474_s_at | glutathione S-transferase, mu 3                                            | 1125.7  | 363.9     | -3.1        |
| Hpx         | 1423944_at   | hemopexin                                                                  | 439.7   | 64.1      | -6.9        |
| Kcnk1       | 1448690_at   | potassium channel, subfamily K, member 1                                   | 750.3   | 242.9     | -3.1        |
| Krt18       | 1448169_at   | keratin 18                                                                 | 3170.6  | 1227.7    | -3.0        |
| Krt19       | 1417156_at   | keratin 19                                                                 | 11777.1 | 3738.6    | -3.2        |
| Krt20       | 1426284_at   | keratin 20                                                                 | 1764.8  | 238.0     | -7.4        |
| Krt7        | 1423952_a_at | keratin 7                                                                  | 1225.9  | 375.1     | -3.3        |
| Krt8        | 1423691_x_at | keratin 8                                                                  | 10878.5 | 2818.7    | -3.9        |
| Lgals4      | 1451336_at   | lectin, galactose binding, soluble 4                                       | 2691.5  | 874.9     | -3.1        |
| Mal         | 1417275_at   | myelin and lymphocyte protein, T-cell differentiation protein              | 4462.8  | 1375.1    | -3.2        |
| Muc5ac      | 1430899_at   | mucin 5, subtypes A and C, tracheobronchial/gastric                        | 11100.2 | 1380.6    | -8.0        |
| Pah         | 1454638_a_at | phenylalanine hydroxylase                                                  | 358.9   | 34.5      | -10.4       |
| Pglyrp1     | 1449184_at   | peptidoglycan recognition protein 1                                        | 403.0   | 127.5     | -3.2        |
| Pigr        | 1455490_at   | polymeric immunoglobulin receptor                                          | 324.0   | 53.0      | -6.1        |
| Pls1        | 1460406_at   | plastin 1 (I-isoform)                                                      | 1419.8  | 453.6     | -3.1        |
| Prom1       | 1419700_a_at | prominin 1                                                                 | 1316.6  | 404.6     | -3.3        |
| Pzp         | 1417246_at   | pregnancy zone protein                                                     | 450.8   | 54.3      | -8.3        |
| Serpina1a   | 1420553_x_at | serine (or cysteine) peptidase inhibitor, clade A, member 1A               | 429.1   | 32.6      | -13.2       |
| Serpina1b   | 1418282_x_at | serine (or cysteine) peptidase inhibitor, clade A, member 1B               | 667.1   | 111.1     | -6.0        |
| Serpina3k   | 1423866_at   | serine (or cysteine) peptidase inhibitor, clade A, member 3K               | 1186.0  | 143.1     | -8.3        |
| Serpinc1    | 1417909_at   | serine (or cysteine) peptidase inhibitor, clade C (antithrombin), member 1 | 337.6   | 104.0     | -3.2        |
| Slc39a4     | 1451139_at   | solute carrier family 39 (zinc transporter), member 4                      | 327.8   | 110.1     | -3.0        |
| Spink4      | 1427119_at   | serine peptidase inhibitor, Kazal type 4                                   | 654.4   | 133.4     | -4.9        |
| Spp1        | 1449254_at   | secreted phosphoprotein 1                                                  | 1267.2  | 70.8      | -17.9       |
| Sult1d1     | 1448973_at   | sulfotransferase family 1D, member 1                                       | 1812.0  | 623.1     | -3.0        |
| Tff2        | 1422448_at   | trefoil factor 2 (spasmolytic protein 1)                                   | 15520.2 | 2635.3    | -5.9        |
| Ttr         | 1455913_x_at | transthyretin                                                              | 1357.6  | 410.6     | -3.3        |
| Vill1       | 1448837_at   | villin 1                                                                   | 351.2   | 39.4      | -8.9        |
